# Supplementary material
Source: MDPI journal article supplement (https://www.mdpi.com/2071-1050/12/5/2061)
Supplement: s1 [file s1]

## **Appendix A List of industries (32 industries)**

Wild fisheries  
Aquaculture  
Agriculture and forestry  
Mineral products  
Seafood processing  
Food and beverage  
Textile and leather  
Wood and paper  
Printing and copying  
Coal and petroleum  
Chemical products  
Non-metallic mineral products  
Primary metal products  
Metal products  
General machinery  
Electric and electronic equipment  
Precision instruments  
Transport equipment  
Other manufacturing  
Electricity, gas, and water  
Construction  
Wholesale and retail  
Food service  
Transportation  
Telecommunications and broadcasting  
Finance and insurance  
Real estate and business services  
Public administration and defense  
Educational and health services  
Social and other services  
Office supplies

## Appendix B Entire set of SPA results

**Table B.1 Backward linkage SPA: Wild fisheries**

| Destination              | Global Influence | Elementary Paths                                                                                      | Direct Influence | Path Multiplier | Total Influence | TG ratio (in %) |
|--------------------------|------------------|-------------------------------------------------------------------------------------------------------|------------------|-----------------|-----------------|-----------------|
| Wild fisheries           | 1.0159           | Wild fisheries → Wild fisheries                                                                       | 0.0156           | 1.0922          | 0.0170          | 1.7             |
| Aquaculture              | 0.0000           | Wild fisheries → Food and beverage → Seafood processing → Aquaculture                                 | 0.0000           | 1.4246          | 0.0000          | 50.2            |
|                          |                  | Wild fisheries → Food and beverage → Aquaculture                                                      | 0.0000           | 1.2946          | 0.0000          | 14.4            |
|                          |                  | Wild fisheries → Agriculture and forestry → Food and beverage → Seafood processing → Aquaculture      | 0.0000           | 1.4955          | 0.0000          | 7.9             |
|                          |                  | Wild fisheries → Real estate and business services → Aquaculture                                      | 0.0000           | 1.1968          | 0.0000          | 4.4             |
|                          |                  | Wild fisheries → Chemical products → Aquaculture                                                      | 0.0000           | 1.6227          | 0.0000          | 2.8             |
|                          |                  | Wild fisheries → Agriculture and forestry → Food and beverage → Aquaculture                           | 0.0000           | 1.3589          | 0.0000          | 2.3             |
|                          |                  | Wild fisheries → Transport equipment → Other manufacturing → Aquaculture                              | 0.0000           | 1.6344          | 0.0000          | 2.1             |
| Agriculture and forestry | 0.0172           | Wild fisheries → Agriculture and forestry                                                             | 0.0111           | 1.1254          | 0.0124          | 72.5            |
|                          |                  | Wild fisheries → Food and beverage → Agriculture and forestry                                         | 0.0033           | 1.2640          | 0.0041          | 24.1            |
| Mineral products         | 0.0006           | Wild fisheries → Coal and petroleum → Mineral products                                                | 0.0003           | 1.0665          | 0.0003          | 45.2            |
|                          |                  | Wild fisheries → Chemical products → Mineral products                                                 | 0.0000           | 1.5099          | 0.0000          | 6.5             |
|                          |                  | Wild fisheries → Electric and electronic equipment → Non-metallic mineral products → Mineral products | 0.0000           | 1.5137          | 0.0000          | 3.6             |
|                          |                  | Wild fisheries → Transportation → Coal and petroleum → Mineral products                               | 0.0000           | 1.1236          | 0.0000          | 2.7             |
|                          |                  | Wild fisheries → Wood and paper → Non-metallic mineral products → Mineral products                    | 0.0000           | 1.4693          | 0.0000          | 2.3             |
|                          |                  | Wild fisheries → Non-metallic mineral products → Mineral products                                     | 0.0000           | 1.1235          | 0.0000          | 2.2             |
|                          |                  | Wild fisheries → Mineral products                                                                     | 0.0000           | 1.0164          | 0.0000          | 0.6             |
| Seafood processing       | 0.0001           | Wild fisheries → Food and beverage → Seafood processing                                               | 0.0000           | 1.3251          | 0.0001          | 79.9            |
|                          |                  | Wild fisheries → Agriculture and forestry → Food and beverage → Seafood processing                    | 0.0000           | 1.3910          | 0.0000          | 12.6            |
| Food and beverage        | 0.0189           | Wild fisheries → Food and beverage                                                                    | 0.0132           | 1.2041          | 0.0160          | 84.4            |
|                          |                  | Wild fisheries → Agriculture and forestry → Food and beverage                                         | 0.0020           | 1.2640          | 0.0025          | 13.3            |
| Textile and leather      | 0.0284           | Wild fisheries → Textile and leather                                                                  | 0.0204           | 1.3054          | 0.0266          | 93.7            |
| Wood and paper           | 0.0600           | Wild fisheries → Wood and paper                                                                       | 0.0427           | 1.3287          | 0.0567          | 94.4            |
| Printing and copying     | 0.0019           | Wild fisheries → Wood and paper → Printing and copying                                                | 0.0002           | 1.5015          | 0.0002          | 12.8            |
|                          |                  | Wild fisheries → Finance and insurance → Printing and copying                                         | 0.0001           | 1.5120          | 0.0002          | 11.9            |

|                               |        |                                                                                                          |        |        |        |      |
|-------------------------------|--------|----------------------------------------------------------------------------------------------------------|--------|--------|--------|------|
|                               |        | Wild fisheries → Real estate and business services → Printing and copying                                | 0.0001 | 1.2586 | 0.0001 | 7.3  |
|                               |        | Wild fisheries → Coal and petroleum → Printing and copying                                               | 0.0001 | 1.2061 | 0.0001 | 7.2  |
|                               |        | Wild fisheries → Printing and copying                                                                    | 0.0001 | 1.1492 | 0.0001 | 5.9  |
|                               |        | Wild fisheries → Chemical products → Printing and copying                                                | 0.0000 | 1.7067 | 0.0001 | 3.8  |
|                               |        | Wild fisheries → Wholesale and retail → Printing and copying                                             | 0.0001 | 1.1833 | 0.0001 | 3.6  |
|                               |        | Wild fisheries → Office supplies → Printing and copying                                                  | 0.0000 | 1.1514 | 0.0001 | 3.0  |
|                               |        | Wild fisheries → Textile and leather → Printing and copying                                              | 0.0000 | 1.4768 | 0.0001 | 3.0  |
|                               |        | Wild fisheries → Transportation → Printing and copying                                                   | 0.0000 | 1.2146 | 0.0000 | 2.4  |
|                               |        | Wild fisheries → Food and beverage → Printing and copying                                                | 0.0000 | 1.3622 | 0.0000 | 2.4  |
| Coal and petroleum            | 0.1799 | Wild fisheries → Coal and petroleum                                                                      | 0.1463 | 1.0662 | 0.1560 | 86.7 |
|                               |        | Wild fisheries → Transportation → Coal and petroleum                                                     | 0.0082 | 1.1233 | 0.0093 | 5.1  |
|                               |        | Wild fisheries → Chemical products → Coal and petroleum                                                  | 0.0030 | 1.5770 | 0.0048 | 2.7  |
| Chemical products             | 0.0762 | Wild fisheries → Chemical products                                                                       | 0.0308 | 1.5092 | 0.0465 | 61.1 |
|                               |        | Wild fisheries → Wood and paper → Chemical products                                                      | 0.0029 | 1.9721 | 0.0057 | 7.4  |
|                               |        | Wild fisheries → Coal and petroleum → Chemical products                                                  | 0.0035 | 1.5770 | 0.0056 | 7.3  |
|                               |        | Wild fisheries → Textile and leather → Chemical products                                                 | 0.0021 | 1.9375 | 0.0041 | 5.3  |
|                               |        | Wild fisheries → Transport equipment → Chemical products                                                 | 0.0018 | 2.0900 | 0.0038 | 4.9  |
| Non-metallic mineral products | 0.0022 | Wild fisheries → Electric and electronic equipment → Non-metallic mineral products                       | 0.0003 | 1.5130 | 0.0004 | 17.6 |
|                               |        | Wild fisheries → Wood and paper → Non-metallic mineral products                                          | 0.0002 | 1.4687 | 0.0002 | 11.1 |
|                               |        | Wild fisheries → Non-metallic mineral products                                                           | 0.0002 | 1.1230 | 0.0002 | 10.4 |
|                               |        | Wild fisheries → Chemical products → Non-metallic mineral products                                       | 0.0001 | 1.6679 | 0.0002 | 8.6  |
|                               |        | Wild fisheries → Transport equipment → Non-metallic mineral products                                     | 0.0001 | 1.5556 | 0.0002 | 7.1  |
|                               |        | Wild fisheries → Food and beverage → Non-metallic mineral products                                       | 0.0001 | 1.3311 | 0.0001 | 4.4  |
|                               |        | Wild fisheries → Real estate and business services → Construction → Non-metallic mineral products        | 0.0000 | 1.2311 | 0.0001 | 2.5  |
|                               |        | Wild fisheries → Coal and petroleum → Non-metallic mineral products                                      | 0.0000 | 1.1785 | 0.0000 | 2.2  |
|                               |        | Wild fisheries → Transport equipment → Electric and electronic equipment → Non-metallic mineral products | 0.0000 | 2.0955 | 0.0000 | 2.0  |
| Primary metal products        | 0.0213 | Wild fisheries → Transport equipment → Primary metal products                                            | 0.0020 | 2.6720 | 0.0055 | 25.6 |
|                               |        | Wild fisheries → General machinery → Primary metal products                                              | 0.0014 | 2.3561 | 0.0033 | 15.3 |
|                               |        | Wild fisheries → Primary metal products                                                                  | 0.0011 | 1.9296 | 0.0022 | 10.4 |

|                                   |        |                                                                                   |        |        |        |      |
|-----------------------------------|--------|-----------------------------------------------------------------------------------|--------|--------|--------|------|
|                                   |        | Wild fisheries → Electric and electronic equipment → Primary metal products       | 0.0004 | 2.5992 | 0.0009 | 4.4  |
|                                   |        | Wild fisheries → Transport equipment → Metal products → Primary metal products    | 0.0003 | 3.0702 | 0.0008 | 3.8  |
|                                   |        | Wild fisheries → Coal and petroleum → Metal products → Primary metal products     | 0.0003 | 2.3257 | 0.0007 | 3.2  |
|                                   |        | Wild fisheries → Metal products → Primary metal products                          | 0.0003 | 2.2176 | 0.0006 | 2.7  |
|                                   |        | Wild fisheries → General machinery → Metal products → Primary metal products      | 0.0002 | 2.7026 | 0.0005 | 2.3  |
|                                   |        | Wild fisheries → Transport equipment → General machinery → Primary metal products | 0.0001 | 3.2607 | 0.0005 | 2.2  |
|                                   |        | Wild fisheries → Transportation → Transport equipment → Primary metal products    | 0.0002 | 2.8199 | 0.0004 | 2.1  |
| Metal products                    | 0.0082 | Wild fisheries → Transport equipment → Metal products                             | 0.0009 | 1.6223 | 0.0014 | 17.2 |
|                                   |        | Wild fisheries → Coal and petroleum → Metal products                              | 0.0010 | 1.2288 | 0.0012 | 14.4 |
|                                   |        | Wild fisheries → Metal products                                                   | 0.0008 | 1.1713 | 0.0010 | 12.1 |
|                                   |        | Wild fisheries → General machinery → Metal products                               | 0.0006 | 1.4300 | 0.0009 | 10.6 |
|                                   |        | Wild fisheries → Wood and paper → Metal products                                  | 0.0002 | 1.5319 | 0.0004 | 4.4  |
|                                   |        | Wild fisheries → Chemical products → Metal products                               | 0.0002 | 1.7388 | 0.0004 | 4.3  |
|                                   |        | Wild fisheries → Textile and leather → Metal products                             | 0.0002 | 1.5051 | 0.0003 | 3.6  |
|                                   |        | Wild fisheries → Electric and electronic equipment → Metal products               | 0.0002 | 1.5782 | 0.0003 | 3.1  |
|                                   |        | Wild fisheries → Food and beverage → Metal products                               | 0.0002 | 1.3884 | 0.0002 | 3.0  |
| General machinery                 | 0.0171 | Wild fisheries → General machinery                                                | 0.0093 | 1.2430 | 0.0116 | 68.0 |
|                                   |        | Wild fisheries → Transport equipment → General machinery                          | 0.0010 | 1.7209 | 0.0017 | 9.8  |
|                                   |        | Wild fisheries → Coal and petroleum → General machinery                           | 0.0008 | 1.3041 | 0.0011 | 6.2  |
|                                   |        | Wild fisheries → Chemical products → General machinery                            | 0.0002 | 1.8452 | 0.0004 | 2.5  |
| Electric and electronic equipment | 0.0214 | Wild fisheries → Electric and electronic equipment                                | 0.0108 | 1.3691 | 0.0148 | 68.8 |
|                                   |        | Wild fisheries → Transport equipment → Electric and electronic equipment          | 0.0009 | 1.8965 | 0.0017 | 7.9  |
|                                   |        | Wild fisheries → General machinery → Electric and electronic equipment            | 0.0005 | 1.6727 | 0.0008 | 4.0  |
| Precision instruments             | 0.0025 | Wild fisheries → Precision instruments                                            | 0.0015 | 1.0653 | 0.0016 | 64.2 |
|                                   |        | Wild fisheries → Coal and petroleum → Precision instruments                       | 0.0001 | 1.1180 | 0.0001 | 5.8  |
|                                   |        | Wild fisheries → General machinery → Precision instruments                        | 0.0001 | 1.3032 | 0.0001 | 4.9  |
|                                   |        | Wild fisheries → Transport equipment → Precision instruments                      | 0.0001 | 1.4759 | 0.0001 | 4.6  |
|                                   |        | Wild fisheries → Electric and electronic equipment → Precision instruments        | 0.0001 | 1.4342 | 0.0001 | 3.5  |
| Transport equipment               | 0.0467 | Wild fisheries → Transport equipment                                              | 0.0291 | 1.4074 | 0.0410 | 87.8 |

|                             |        |                                                                                           |        |        |        |      |
|-----------------------------|--------|-------------------------------------------------------------------------------------------|--------|--------|--------|------|
|                             |        | Wild fisheries → Transportation → Transport equipment                                     | 0.0023 | 1.4855 | 0.0034 | 7.2  |
| Other manufacturing         | 0.0022 | Wild fisheries → Transport equipment → Other manufacturing                                | 0.0005 | 1.5201 | 0.0008 | 35.9 |
|                             |        | Wild fisheries → Other manufacturing                                                      | 0.0005 | 1.0974 | 0.0005 | 24.0 |
|                             |        | Wild fisheries → Textile and leather → Other manufacturing                                | 0.0002 | 1.4087 | 0.0002 | 10.1 |
|                             |        | Wild fisheries → Transportation → Transport equipment → Other manufacturing               | 0.0000 | 1.6044 | 0.0001 | 3.0  |
|                             |        | Wild fisheries → Office supplies → Other manufacturing                                    | 0.0001 | 1.0998 | 0.0001 | 2.5  |
|                             |        | Wild fisheries → Wholesale and retail → Other manufacturing                               | 0.0000 | 1.1300 | 0.0000 | 2.1  |
| Electricity, gas, and water | 0.0156 | Wild fisheries → Coal and petroleum → Electricity, gas, and water                         | 0.0022 | 1.2856 | 0.0029 | 18.5 |
|                             |        | Wild fisheries → Wood and paper → Electricity, gas, and water                             | 0.0015 | 1.6035 | 0.0024 | 15.4 |
|                             |        | Wild fisheries → Electricity, gas, and water                                              | 0.0012 | 1.2261 | 0.0015 | 9.4  |
|                             |        | Wild fisheries → Chemical products → Electricity, gas, and water                          | 0.0004 | 1.8205 | 0.0008 | 5.2  |
|                             |        | Wild fisheries → Textile and leather → Electricity, gas, and water                        | 0.0005 | 1.5755 | 0.0008 | 4.9  |
|                             |        | Wild fisheries → Transportation → Electricity, gas, and water                             | 0.0005 | 1.2958 | 0.0007 | 4.3  |
|                             |        | Wild fisheries → Wholesale and retail → Electricity, gas, and water                       | 0.0005 | 1.2625 | 0.0007 | 4.2  |
|                             |        | Wild fisheries → Real estate and business services → Electricity, gas, and water          | 0.0005 | 1.3422 | 0.0006 | 4.1  |
|                             |        | Wild fisheries → Finance and insurance → Electricity, gas, and water                      | 0.0002 | 1.6132 | 0.0003 | 2.2  |
| Construction                | 0.0019 | Wild fisheries → Real estate and business services → Construction                         | 0.0006 | 1.1140 | 0.0006 | 33.7 |
|                             |        | Wild fisheries → Construction                                                             | 0.0002 | 1.0192 | 0.0002 | 11.3 |
|                             |        | Wild fisheries → Wholesale and retail → Real estate and business services → Construction  | 0.0001 | 1.1448 | 0.0001 | 4.0  |
|                             |        | Wild fisheries → Finance and insurance → Real estate and business services → Construction | 0.0000 | 1.4559 | 0.0001 | 3.8  |
|                             |        | Wild fisheries → Coal and petroleum → Real estate and business services → Construction    | 0.0001 | 1.1686 | 0.0001 | 3.5  |
|                             |        | Wild fisheries → Transportation → Real estate and business services → Construction        | 0.0000 | 1.1764 | 0.0001 | 2.8  |
| Wholesale and retail        | 0.0411 | Wild fisheries → Wholesale and retail                                                     | 0.0247 | 1.0464 | 0.0259 | 63.0 |
|                             |        | Wild fisheries → Wood and paper → Wholesale and retail                                    | 0.0019 | 1.3672 | 0.0025 | 6.2  |
|                             |        | Wild fisheries → Chemical products → Wholesale and retail                                 | 0.0010 | 1.5531 | 0.0015 | 3.7  |
|                             |        | Wild fisheries → Transport equipment → Wholesale and retail                               | 0.0010 | 1.4489 | 0.0014 | 3.4  |
|                             |        | Wild fisheries → Coal and petroleum → Wholesale and retail                                | 0.0010 | 1.0976 | 0.0010 | 2.6  |
|                             |        | Wild fisheries → Textile and leather → Wholesale and retail                               | 0.0007 | 1.3441 | 0.0009 | 2.3  |
|                             |        | Wild fisheries → Food and beverage → Wholesale and retail                                 | 0.0007 | 1.2402 | 0.0009 | 2.2  |

|                                     |        |                                                                                          |        |        |        |      |
|-------------------------------------|--------|------------------------------------------------------------------------------------------|--------|--------|--------|------|
| Transportation                      | 0.0606 | Wild fisheries → Transportation                                                          | 0.0443 | 1.0738 | 0.0476 | 78.6 |
|                                     |        | Wild fisheries → Wood and paper → Transportation                                         | 0.0015 | 1.4043 | 0.0021 | 3.5  |
|                                     |        | Wild fisheries → Coal and petroleum → Transportation                                     | 0.0019 | 1.1233 | 0.0021 | 3.5  |
|                                     |        | Wild fisheries → Wholesale and retail → Transportation                                   | 0.0018 | 1.1039 | 0.0020 | 3.3  |
| Telecommunications and broadcasting | 0.0086 | Wild fisheries → Telecommunications and broadcasting                                     | 0.0013 | 1.1732 | 0.0015 | 17.9 |
|                                     |        | Wild fisheries → Wholesale and retail → Telecommunications and broadcasting              | 0.0012 | 1.2001 | 0.0015 | 17.5 |
|                                     |        | Wild fisheries → Finance and insurance → Telecommunications and broadcasting             | 0.0006 | 1.5417 | 0.0009 | 11.1 |
|                                     |        | Wild fisheries → Real estate and business services → Telecommunications and broadcasting | 0.0006 | 1.2782 | 0.0008 | 9.2  |
|                                     |        | Wild fisheries → Coal and petroleum → Telecommunications and broadcasting                | 0.0003 | 1.2311 | 0.0004 | 4.6  |
|                                     |        | Wild fisheries → Transportation → Telecommunications and broadcasting                    | 0.0002 | 1.2398 | 0.0003 | 3.2  |
|                                     |        | Wild fisheries → Wood and paper → Telecommunications and broadcasting                    | 0.0001 | 1.5343 | 0.0002 | 2.5  |
| Finance and insurance               | 0.0482 | Wild fisheries → Finance and insurance                                                   | 0.0257 | 1.3369 | 0.0343 | 71.2 |
|                                     |        | Wild fisheries → Transportation → Finance and insurance                                  | 0.0014 | 1.4120 | 0.0019 | 4.0  |
|                                     |        | Wild fisheries → Real estate and business services → Finance and insurance               | 0.0012 | 1.4549 | 0.0018 | 3.7  |
|                                     |        | Wild fisheries → Coal and petroleum → Finance and insurance                              | 0.0009 | 1.4029 | 0.0013 | 2.7  |
|                                     |        | Wild fisheries → Wholesale and retail → Finance and insurance                            | 0.0008 | 1.3762 | 0.0011 | 2.2  |
|                                     |        | Wild fisheries → Wood and paper → Finance and insurance                                  | 0.0006 | 1.7484 | 0.0011 | 2.2  |
| Real estate and business services   | 0.0515 | Wild fisheries → Real estate and business services                                       | 0.0229 | 1.1131 | 0.0255 | 49.6 |
|                                     |        | Wild fisheries → Wholesale and retail → Real estate and business services                | 0.0027 | 1.1441 | 0.0030 | 5.9  |
|                                     |        | Wild fisheries → Finance and insurance → Real estate and business services               | 0.0020 | 1.4549 | 0.0029 | 5.6  |
|                                     |        | Wild fisheries → Coal and petroleum → Real estate and business services                  | 0.0023 | 1.1678 | 0.0026 | 5.1  |
|                                     |        | Wild fisheries → Transportation → Real estate and business services                      | 0.0018 | 1.1755 | 0.0021 | 4.2  |
|                                     |        | Wild fisheries → Chemical products → Real estate and business services                   | 0.0009 | 1.6523 | 0.0014 | 2.8  |
|                                     |        | Wild fisheries → Transport equipment → Real estate and business services                 | 0.0008 | 1.5417 | 0.0013 | 2.5  |
|                                     |        | Wild fisheries → Wood and paper → Real estate and business services                      | 0.0009 | 1.4556 | 0.0013 | 2.5  |
| Public administration and defense   | 0.0004 | Wild fisheries → Transportation → Public administration and defense                      | 0.0003 | 1.0738 | 0.0003 | 78.6 |
|                                     |        | Wild fisheries → Wood and paper → Transportation → Public administration and defense     | 0.0000 | 1.4043 | 0.0000 | 3.5  |
|                                     |        | Wild fisheries → Coal and petroleum → Transportation → Public administration and defense | 0.0000 | 1.1233 | 0.0000 | 3.5  |

|                                 |        |                                                                                            |        |        |        |      |
|---------------------------------|--------|--------------------------------------------------------------------------------------------|--------|--------|--------|------|
|                                 |        | Wild fisheries → Wholesale and retail → Transportation → Public administration and defense | 0.0000 | 1.1039 | 0.0000 | 3.3  |
| Educational and health services | 0.0056 | Wild fisheries → Educational and health services                                           | 0.0032 | 1.0370 | 0.0033 | 59.6 |
|                                 |        | Wild fisheries → Coal and petroleum → Educational and health services                      | 0.0003 | 1.0882 | 0.0003 | 6.0  |
|                                 |        | Wild fisheries → Transportation → Educational and health services                          | 0.0002 | 1.0961 | 0.0002 | 3.3  |
|                                 |        | Wild fisheries → Wood and paper → Educational and health services                          | 0.0001 | 1.3563 | 0.0002 | 3.0  |
|                                 |        | Wild fisheries → Wholesale and retail → Educational and health services                    | 0.0001 | 1.0679 | 0.0002 | 2.8  |
|                                 |        | Wild fisheries → Chemical products → Educational and health services                       | 0.0001 | 1.5398 | 0.0002 | 2.7  |
|                                 |        | Wild fisheries → Real estate and business services → Educational and health services       | 0.0001 | 1.1359 | 0.0001 | 2.3  |
| Social and other services       | 0.0038 | Wild fisheries → Social and other services                                                 | 0.0013 | 1.0669 | 0.0014 | 36.5 |
|                                 |        | Wild fisheries → Real estate and business services → Social and other services             | 0.0003 | 1.1666 | 0.0004 | 9.4  |
|                                 |        | Wild fisheries → Transportation → Social and other services                                | 0.0003 | 1.1276 | 0.0003 | 8.5  |
|                                 |        | Wild fisheries → Coal and petroleum → Social and other services                            | 0.0002 | 1.1197 | 0.0002 | 5.5  |
|                                 |        | Wild fisheries → Wholesale and retail → Social and other services                          | 0.0001 | 1.0986 | 0.0001 | 2.9  |
|                                 |        | Wild fisheries → Finance and insurance → Social and other services                         | 0.0001 | 1.4037 | 0.0001 | 2.8  |
|                                 |        | Wild fisheries → Wood and paper → Social and other services                                | 0.0001 | 1.3953 | 0.0001 | 2.1  |
| Office supplies                 | 0.0011 | Wild fisheries → Office supplies                                                           | 0.0004 | 1.0185 | 0.0004 | 38.1 |
|                                 |        | Wild fisheries → Wood and paper → Office supplies                                          | 0.0001 | 1.3311 | 0.0001 | 7.9  |
|                                 |        | Wild fisheries → Real estate and business services → Office supplies                       | 0.0001 | 1.1157 | 0.0001 | 7.1  |
|                                 |        | Wild fisheries → Wholesale and retail → Office supplies                                    | 0.0000 | 1.0484 | 0.0000 | 4.0  |
|                                 |        | Wild fisheries → Coal and petroleum → Office supplies                                      | 0.0000 | 1.0689 | 0.0000 | 3.8  |
|                                 |        | Wild fisheries → Textile and leather → Office supplies                                     | 0.0000 | 1.3087 | 0.0000 | 3.3  |
|                                 |        | Wild fisheries → Finance and insurance → Office supplies                                   | 0.0000 | 1.3402 | 0.0000 | 3.2  |
|                                 |        | Wild fisheries → Chemical products → Office supplies                                       | 0.0000 | 1.5128 | 0.0000 | 2.2  |
|                                 |        | Wild fisheries → Transportation → Office supplies                                          | 0.0000 | 1.0765 | 0.0000 | 2.1  |

**Table B.2 Backward linkage SPA: Aquaculture**

| <b>Destination</b>       | <b>Global Influence</b> | <b>Elementary Paths</b>                                                            | <b>Direct Influence</b> | <b>Path Multiplier</b> | <b>Total Influence</b> | <b>TG ratio (in %)</b> |
|--------------------------|-------------------------|------------------------------------------------------------------------------------|-------------------------|------------------------|------------------------|------------------------|
| Wild fisheries           | 0.0006                  | Aquaculture → Wild fisheries                                                       | 0.0003                  | 1.0922                 | 0.0004                 | 63.0                   |
|                          |                         | Aquaculture → Food and beverage → Seafood processing → Wild fisheries              | 0.0001                  | 1.4246                 | 0.0001                 | 25.2                   |
|                          |                         | Aquaculture → Food and beverage → Wild fisheries                                   | 0.0000                  | 1.2946                 | 0.0000                 | 8.6                    |
| Aquaculture              | 1.0752                  | Aquaculture → Aquaculture                                                          | 0.0699                  | 1.1911                 | 0.0832                 | 7.7                    |
| Agriculture and forestry | 0.0730                  | Aquaculture → Agriculture and forestry                                             | 0.0351                  | 1.1911                 | 0.0418                 | 57.3                   |
|                          |                         | Aquaculture → Food and beverage → Agriculture and forestry                         | 0.0230                  | 1.3377                 | 0.0307                 | 42.1                   |
| Mineral products         | 0.0008                  | Aquaculture → Mineral products                                                     | 0.0002                  | 1.0757                 | 0.0002                 | 25.9                   |
|                          |                         | Aquaculture → Coal and petroleum → Mineral products                                | 0.0001                  | 1.1288                 | 0.0001                 | 9.6                    |
|                          |                         | Aquaculture → Electricity, gas, and water → Mineral products                       | 0.0001                  | 1.2982                 | 0.0001                 | 8.7                    |
|                          |                         | Aquaculture → Chemical products → Mineral products                                 | 0.0000                  | 1.5980                 | 0.0000                 | 6.2                    |
|                          |                         | Aquaculture → Food and beverage → Non-metallic mineral products → Mineral products | 0.0000                  | 1.4094                 | 0.0000                 | 5.3                    |
|                          |                         | Aquaculture → Food and beverage → Mineral products                                 | 0.0000                  | 1.2750                 | 0.0000                 | 3.7                    |
|                          |                         | Aquaculture → Non-metallic mineral products → Mineral products                     | 0.0000                  | 1.1891                 | 0.0000                 | 3.6                    |
|                          |                         | Aquaculture → Construction → Non-metallic mineral products → Mineral products      | 0.0000                  | 1.1927                 | 0.0000                 | 2.1                    |
| Seafood processing       | 0.0005                  | Aquaculture → Food and beverage → Seafood processing                               | 0.0003                  | 1.4024                 | 0.0004                 | 92.2                   |
|                          |                         | Aquaculture → Agriculture and forestry → Food and beverage → Seafood processing    | 0.0000                  | 1.4722                 | 0.0000                 | 6.6                    |
| Food and beverage        | 0.1273                  | Aquaculture → Food and beverage                                                    | 0.0929                  | 1.2744                 | 0.1185                 | 93.0                   |
|                          |                         | Aquaculture → Agriculture and forestry → Food and beverage                         | 0.0063                  | 1.3377                 | 0.0084                 | 6.6                    |
| Textile and leather      | 0.0782                  | Aquaculture → Textile and leather                                                  | 0.0551                  | 1.3816                 | 0.0761                 | 97.3                   |
| Wood and paper           | 0.0159                  | Aquaculture → Wood and paper                                                       | 0.0058                  | 1.4063                 | 0.0082                 | 51.6                   |
|                          |                         | Aquaculture → Food and beverage → Wood and paper                                   | 0.0014                  | 1.6667                 | 0.0024                 | 15.2                   |
|                          |                         | Aquaculture → Textile and leather → Wood and paper                                 | 0.0004                  | 1.8070                 | 0.0008                 | 4.9                    |
|                          |                         | Aquaculture → Wholesale and retail → Wood and paper                                | 0.0004                  | 1.4470                 | 0.0006                 | 4.0                    |
|                          |                         | Aquaculture → Office supplies → Wood and paper                                     | 0.0004                  | 1.4088                 | 0.0006                 | 3.6                    |
|                          |                         | Aquaculture → Chemical products → Wood and paper                                   | 0.0002                  | 2.0873                 | 0.0004                 | 2.3                    |
| Printing and copying     | 0.0023                  | Aquaculture → Food and beverage → Printing and copying                             | 0.0002                  | 1.4417                 | 0.0003                 | 13.9                   |



|                               |        |                                                                                |        |        |        |      |
|-------------------------------|--------|--------------------------------------------------------------------------------|--------|--------|--------|------|
|                               |        | Aquaculture → Office supplies → Printing and copying                           | 0.0002 | 1.2186 | 0.0002 | 9.3  |
|                               |        | Aquaculture → Finance and insurance → Printing and copying                     | 0.0001 | 1.6003 | 0.0002 | 8.8  |
|                               |        | Aquaculture → Textile and leather → Printing and copying                       | 0.0001 | 1.5630 | 0.0002 | 6.7  |
|                               |        | Aquaculture → Printing and copying                                             | 0.0001 | 1.2163 | 0.0001 | 5.9  |
|                               |        | Aquaculture → Educational and health services → Printing and copying           | 0.0001 | 1.2416 | 0.0001 | 5.1  |
|                               |        | Aquaculture → Wholesale and retail → Printing and copying                      | 0.0001 | 1.2524 | 0.0001 | 4.4  |
|                               |        | Aquaculture → Chemical products → Printing and copying                         | 0.0000 | 1.8064 | 0.0001 | 3.7  |
| Coal and petroleum            | 0.0675 | Aquaculture → Coal and petroleum                                               | 0.0374 | 1.1284 | 0.0422 | 62.5 |
|                               |        | Aquaculture → Chemical products → Coal and petroleum                           | 0.0035 | 1.6691 | 0.0058 | 8.6  |
|                               |        | Aquaculture → Transportation → Coal and petroleum                              | 0.0025 | 1.1888 | 0.0029 | 4.4  |
| Chemical products             | 0.0983 | Aquaculture → Chemical products                                                | 0.0353 | 1.5973 | 0.0564 | 57.4 |
|                               |        | Aquaculture → Textile and leather → Chemical products                          | 0.0057 | 2.0506 | 0.0116 | 11.8 |
|                               |        | Aquaculture → Food and beverage → Chemical products                            | 0.0030 | 1.8928 | 0.0057 | 5.8  |
|                               |        | Aquaculture → Transport equipment → Chemical products                          | 0.0022 | 2.2120 | 0.0048 | 4.9  |
|                               |        | Aquaculture → Agriculture and forestry → Chemical products                     | 0.0024 | 1.7690 | 0.0042 | 4.3  |
|                               |        | Aquaculture → Food and beverage → Agriculture and forestry → Chemical products | 0.0016 | 1.9866 | 0.0031 | 3.2  |
|                               |        | Aquaculture → Educational and health services → Chemical products              | 0.0013 | 1.6297 | 0.0021 | 2.1  |
| Non-metallic mineral products | 0.0031 | Aquaculture → Food and beverage → Non-metallic mineral products                | 0.0005 | 1.4088 | 0.0007 | 23.6 |
|                               |        | Aquaculture → Non-metallic mineral products                                    | 0.0004 | 1.1886 | 0.0005 | 16.0 |
|                               |        | Aquaculture → Construction → Non-metallic mineral products                     | 0.0002 | 1.1922 | 0.0003 | 9.4  |
|                               |        | Aquaculture → Chemical products → Non-metallic mineral products                | 0.0001 | 1.7653 | 0.0002 | 7.6  |
|                               |        | Aquaculture → Transport equipment → Non-metallic mineral products              | 0.0001 | 1.6464 | 0.0002 | 6.6  |
| Primary metal products        | 0.0236 | Aquaculture → Transport equipment → Primary metal products                     | 0.0025 | 2.8280 | 0.0070 | 29.7 |
|                               |        | Aquaculture → Primary metal products                                           | 0.0020 | 2.0422 | 0.0041 | 17.5 |
|                               |        | Aquaculture → General machinery → Primary metal products                       | 0.0005 | 2.4936 | 0.0013 | 5.6  |
|                               |        | Aquaculture → Food and beverage → Metal products → Primary metal products      | 0.0004 | 2.7819 | 0.0011 | 4.5  |
|                               |        | Aquaculture → Transport equipment → Metal products → Primary metal products    | 0.0003 | 3.2495 | 0.0010 | 4.4  |
|                               |        | Aquaculture → Metal products → Primary metal products                          | 0.0004 | 2.3470 | 0.0009 | 4.0  |
|                               |        | Aquaculture → Transport equipment → General machinery → Primary metal products | 0.0002 | 3.4510 | 0.0006 | 2.6  |
|                               |        | Aquaculture → Construction → Primary metal products                            | 0.0003 | 2.0483 | 0.0005 | 2.3  |

|                                   |        |                                                                                       |        |        |        |      |
|-----------------------------------|--------|---------------------------------------------------------------------------------------|--------|--------|--------|------|
|                                   |        | Aquaculture → Textile and leather → Metal products → Primary metal products           | 0.0002 | 3.0158 | 0.0005 | 2.1  |
| Metal products                    | 0.0103 | Aquaculture → Food and beverage → Metal products                                      | 0.0013 | 1.4694 | 0.0019 | 18.1 |
|                                   |        | Aquaculture → Transport equipment → Metal products                                    | 0.0011 | 1.7171 | 0.0018 | 17.7 |
|                                   |        | Aquaculture → Metal products                                                          | 0.0013 | 1.2397 | 0.0017 | 16.2 |
|                                   |        | Aquaculture → Textile and leather → Metal products                                    | 0.0005 | 1.5930 | 0.0009 | 8.3  |
|                                   |        | Aquaculture → Chemical products → Metal products                                      | 0.0002 | 1.8403 | 0.0004 | 4.2  |
|                                   |        | Aquaculture → General machinery → Metal products                                      | 0.0002 | 1.5135 | 0.0004 | 3.5  |
|                                   |        | Aquaculture → Construction → Metal products                                           | 0.0003 | 1.2435 | 0.0003 | 3.2  |
|                                   |        | Aquaculture → Coal and petroleum → Metal products                                     | 0.0002 | 1.3005 | 0.0003 | 3.1  |
| General machinery                 | 0.0107 | Aquaculture → General machinery                                                       | 0.0036 | 1.3155 | 0.0047 | 44.5 |
|                                   |        | Aquaculture → Transport equipment → General machinery                                 | 0.0012 | 1.8214 | 0.0021 | 20.1 |
|                                   |        | Aquaculture → Chemical products → General machinery                                   | 0.0003 | 1.9530 | 0.0005 | 4.8  |
|                                   |        | Aquaculture → Textile and leather → General machinery                                 | 0.0002 | 1.6904 | 0.0003 | 3.1  |
|                                   |        | Aquaculture → Food and beverage → General machinery                                   | 0.0002 | 1.5593 | 0.0003 | 3.0  |
|                                   |        | Aquaculture → Coal and petroleum → General machinery                                  | 0.0002 | 1.3802 | 0.0003 | 2.7  |
| Electric and electronic equipment | 0.0088 | Aquaculture → Transport equipment → Electric and electronic equipment                 | 0.0011 | 2.0072 | 0.0022 | 24.7 |
|                                   |        | Aquaculture → Electric and electronic equipment                                       | 0.0012 | 1.4491 | 0.0018 | 20.5 |
|                                   |        | Aquaculture → General machinery → Electric and electronic equipment                   | 0.0002 | 1.7704 | 0.0003 | 3.9  |
|                                   |        | Aquaculture → Telecommunications and broadcasting → Electric and electronic equipment | 0.0002 | 1.6725 | 0.0003 | 2.9  |
|                                   |        | Aquaculture → Electricity, gas, and water → Electric and electronic equipment         | 0.0001 | 1.7484 | 0.0002 | 2.8  |
|                                   |        | Aquaculture → Wholesale and retail → Electric and electronic equipment                | 0.0002 | 1.4917 | 0.0002 | 2.7  |
|                                   |        | Aquaculture → Construction → Electric and electronic equipment                        | 0.0001 | 1.4535 | 0.0002 | 2.3  |
| Precision instruments             | 0.0011 | Aquaculture → Educational and health services → Precision instruments                 | 0.0002 | 1.1509 | 0.0002 | 18.2 |
|                                   |        | Aquaculture → Precision instruments                                                   | 0.0001 | 1.1275 | 0.0002 | 15.3 |
|                                   |        | Aquaculture → Transport equipment → Precision instruments                             | 0.0001 | 1.5620 | 0.0001 | 13.4 |
|                                   |        | Aquaculture → General machinery → Precision instruments                               | 0.0000 | 1.3793 | 0.0000 | 4.6  |
|                                   |        | Aquaculture → Coal and petroleum → Precision instruments                              | 0.0000 | 1.1833 | 0.0000 | 3.6  |
|                                   |        | Aquaculture → Electricity, gas, and water → Precision instruments                     | 0.0000 | 1.3607 | 0.0000 | 2.9  |
|                                   |        | Aquaculture → Agriculture and forestry → Precision instruments                        | 0.0000 | 1.2490 | 0.0000 | 2.5  |

|                             |        |                                                                                       |        |        |        |      |
|-----------------------------|--------|---------------------------------------------------------------------------------------|--------|--------|--------|------|
|                             |        | Aquaculture → Transport equipment → General machinery → Precision instruments         | 0.0000 | 1.9096 | 0.0000 | 2.1  |
| Transport equipment         | 0.0566 | Aquaculture → Transport equipment                                                     | 0.0354 | 1.4896 | 0.0527 | 93.2 |
| Other manufacturing         | 0.0029 | Aquaculture → Transport equipment → Other manufacturing                               | 0.0006 | 1.6089 | 0.0010 | 34.1 |
|                             |        | Aquaculture → Textile and leather → Other manufacturing                               | 0.0004 | 1.4910 | 0.0006 | 21.3 |
|                             |        | Aquaculture → Office supplies → Other manufacturing                                   | 0.0002 | 1.1640 | 0.0002 | 7.3  |
|                             |        | Aquaculture → Other manufacturing                                                     | 0.0002 | 1.1614 | 0.0002 | 7.1  |
|                             |        | Aquaculture → Food and beverage → Other manufacturing                                 | 0.0001 | 1.3766 | 0.0002 | 6.2  |
|                             |        | Aquaculture → Educational and health services → Other manufacturing                   | 0.0001 | 1.1855 | 0.0001 | 4.3  |
|                             |        | Aquaculture → Wholesale and retail → Other manufacturing                              | 0.0001 | 1.1960 | 0.0001 | 2.4  |
| Electricity, gas, and water | 0.0373 | Aquaculture → Electricity, gas, and water                                             | 0.0181 | 1.2976 | 0.0234 | 62.8 |
|                             |        | Aquaculture → Textile and leather → Electricity, gas, and water                       | 0.0013 | 1.6674 | 0.0022 | 5.8  |
|                             |        | Aquaculture → Food and beverage → Electricity, gas, and water                         | 0.0007 | 1.5381 | 0.0011 | 3.0  |
|                             |        | Aquaculture → Wholesale and retail → Electricity, gas, and water                      | 0.0008 | 1.3362 | 0.0010 | 2.7  |
|                             |        | Aquaculture → Chemical products → Electricity, gas, and water                         | 0.0005 | 1.9267 | 0.0010 | 2.6  |
|                             |        | Aquaculture → Coal and petroleum → Electricity, gas, and water                        | 0.0006 | 1.3606 | 0.0008 | 2.1  |
| Construction                | 0.0049 | Aquaculture → Construction                                                            | 0.0030 | 1.0787 | 0.0033 | 66.7 |
|                             |        | Aquaculture → Real estate and business services → Construction                        | 0.0001 | 1.1790 | 0.0002 | 3.6  |
|                             |        | Aquaculture → Electricity, gas, and water → Construction                              | 0.0001 | 1.3017 | 0.0001 | 2.8  |
|                             |        | Aquaculture → Wholesale and retail → Real estate and business services → Construction | 0.0001 | 1.2116 | 0.0001 | 2.4  |
| Wholesale and retail        | 0.0632 | Aquaculture → Wholesale and retail                                                    | 0.0362 | 1.1074 | 0.0401 | 63.4 |
|                             |        | Aquaculture → Food and beverage → Wholesale and retail                                | 0.0052 | 1.3126 | 0.0068 | 10.7 |
|                             |        | Aquaculture → Textile and leather → Wholesale and retail                              | 0.0019 | 1.4226 | 0.0027 | 4.3  |
|                             |        | Aquaculture → Chemical products → Wholesale and retail                                | 0.0011 | 1.6438 | 0.0019 | 2.9  |
|                             |        | Aquaculture → Transport equipment → Wholesale and retail                              | 0.0012 | 1.5334 | 0.0018 | 2.8  |
| Transportation              | 0.0322 | Aquaculture → Transportation                                                          | 0.0133 | 1.1365 | 0.0151 | 47.0 |
|                             |        | Aquaculture → Food and beverage → Transportation                                      | 0.0029 | 1.3471 | 0.0038 | 11.9 |
|                             |        | Aquaculture → Wholesale and retail → Transportation                                   | 0.0027 | 1.1684 | 0.0031 | 9.7  |
|                             |        | Aquaculture → Textile and leather → Transportation                                    | 0.0010 | 1.4603 | 0.0014 | 4.5  |
|                             |        | Aquaculture → Chemical products → Transportation                                      | 0.0006 | 1.6871 | 0.0010 | 3.1  |

|                                     |          |                                                                                              |        |        |        |      |
|-------------------------------------|----------|----------------------------------------------------------------------------------------------|--------|--------|--------|------|
| Telecommunications and broadcasting | 0.0128   | Aquaculture → Telecommunications and broadcasting                                            | 0.0038 | 1.2417 | 0.0047 | 36.7 |
|                                     |          | Aquaculture → Wholesale and retail → Telecommunications and broadcasting                     | 0.0018 | 1.2702 | 0.0023 | 18.1 |
|                                     |          | Aquaculture → Finance and insurance → Telecommunications and broadcasting                    | 0.0005 | 1.6317 | 0.0009 | 6.8  |
|                                     |          | Aquaculture → Food and beverage → Wholesale and retail → Telecommunications and broadcasting | 0.0003 | 1.5055 | 0.0004 | 3.1  |
|                                     |          | Aquaculture → Textile and leather → Telecommunications and broadcasting                      | 0.0002 | 1.5955 | 0.0003 | 2.5  |
| Finance and insurance               | 0.0469   | Aquaculture → Finance and insurance                                                          | 0.0224 | 1.4149 | 0.0317 | 67.6 |
|                                     |          | Aquaculture → Wholesale and retail → Finance and insurance                                   | 0.0011 | 1.4566 | 0.0017 | 3.5  |
|                                     |          | Aquaculture → Textile and leather → Finance and insurance                                    | 0.0009 | 1.8181 | 0.0016 | 3.5  |
|                                     |          | Aquaculture → Food and beverage → Finance and insurance                                      | 0.0009 | 1.6771 | 0.0014 | 3.0  |
| Real estate and business services   | 0.0391   | Aquaculture → Real estate and business services                                              | 0.0059 | 1.1781 | 0.0069 | 17.8 |
|                                     |          | Aquaculture → Wholesale and retail → Real estate and business services                       | 0.0039 | 1.2109 | 0.0047 | 12.0 |
|                                     |          | Aquaculture → Food and beverage → Real estate and business services                          | 0.0027 | 1.3964 | 0.0037 | 9.5  |
|                                     |          | Aquaculture → Textile and leather → Real estate and business services                        | 0.0018 | 1.5137 | 0.0028 | 7.1  |
|                                     |          | Aquaculture → Finance and insurance → Real estate and business services                      | 0.0017 | 1.5398 | 0.0027 | 6.8  |
|                                     |          | Aquaculture → Chemical products → Real estate and business services                          | 0.0010 | 1.7488 | 0.0017 | 4.4  |
|                                     |          | Aquaculture → Transport equipment → Real estate and business services                        | 0.0010 | 1.6317 | 0.0016 | 4.2  |
|                                     |          | Aquaculture → Educational and health services → Real estate and business services            | 0.0007 | 1.2022 | 0.0009 | 2.3  |
|                                     |          | Aquaculture → Food and beverage → Wholesale and retail → Real estate and business services   | 0.0006 | 1.4352 | 0.0008 | 2.0  |
| Public administration and defense   | 0.000218 | Aquaculture → Transportation → Public administration and defense                             | 0.0001 | 1.1365 | 0.0001 | 47.0 |
|                                     |          | Aquaculture → Food and beverage → Transportation → Public administration and defense         | 0.0000 | 1.3471 | 0.0000 | 11.9 |
|                                     |          | Aquaculture → Wholesale and retail → Transportation → Public administration and defense      | 0.0000 | 1.1684 | 0.0000 | 9.7  |
|                                     |          | Aquaculture → Textile and leather → Transportation → Public administration and defense       | 0.0000 | 1.4603 | 0.0000 | 4.5  |
|                                     |          | Aquaculture → Chemical products → Transportation → Public administration and defense         | 0.0000 | 1.6871 | 0.0000 | 3.1  |
| Educational and health services     | 0.0232   | Aquaculture → Educational and health services                                                | 0.0187 | 1.0976 | 0.0205 | 88.3 |
| Social and other services           | 0.0043   | Aquaculture → Social and other services                                                      | 0.0016 | 1.1292 | 0.0019 | 42.8 |
|                                     |          | Aquaculture → Wholesale and retail → Social and other services                               | 0.0001 | 1.1627 | 0.0002 | 3.9  |

|                 |        |                                                                               |        |        |        |      |
|-----------------|--------|-------------------------------------------------------------------------------|--------|--------|--------|------|
|                 |        | Aquaculture → Food and beverage → Social and other services                   | 0.0001 | 1.3384 | 0.0002 | 3.5  |
|                 |        | Aquaculture → Textile and leather → Social and other services                 | 0.0001 | 1.4510 | 0.0001 | 3.4  |
|                 |        | Aquaculture → Telecommunications and broadcasting → Social and other services | 0.0001 | 1.3030 | 0.0001 | 3.1  |
|                 |        | Aquaculture → Educational and health services → Social and other services     | 0.0001 | 1.1526 | 0.0001 | 3.0  |
|                 |        | Aquaculture → Transportation → Social and other services                      | 0.0001 | 1.1934 | 0.0001 | 2.4  |
|                 |        | Aquaculture → Finance and insurance → Social and other services               | 0.0001 | 1.4856 | 0.0001 | 2.3  |
|                 |        | Aquaculture → Real estate and business services → Social and other services   | 0.0001 | 1.2348 | 0.0001 | 2.2  |
| Office supplies | 0.0025 | Aquaculture → Office supplies                                                 | 0.0016 | 1.0779 | 0.0017 | 66.4 |
|                 |        | Aquaculture → Educational and health services → Office supplies               | 0.0001 | 1.1003 | 0.0001 | 4.4  |
|                 |        | Aquaculture → Textile and leather → Office supplies                           | 0.0001 | 1.3851 | 0.0001 | 4.3  |
|                 |        | Aquaculture → Food and beverage → Office supplies                             | 0.0001 | 1.2777 | 0.0001 | 2.9  |
|                 |        | Aquaculture → Wholesale and retail → Office supplies                          | 0.0001 | 1.1096 | 0.0001 | 2.8  |

**Table B.3 Backward linkage SPA: Seafood processing**

| <b>Destination</b>       | <b>Global Influence</b> | <b>Elementary Paths</b>                                                            | <b>Direct Influence</b> | <b>Path Multiplier</b> | <b>Total Influence</b> | <b>TG ratio (in %)</b> |
|--------------------------|-------------------------|------------------------------------------------------------------------------------|-------------------------|------------------------|------------------------|------------------------|
| Wild fisheries           | 0.3722                  | Seafood processing → Wild fisheries                                                | 0.3329                  | 1.1181                 | 0.3722                 | 100.0                  |
| Aquaculture              | 0.0918                  | Seafood processing → Aquaculture                                                   | 0.0776                  | 1.1833                 | 0.0918                 | 100.0                  |
| Agriculture and forestry | 0.0187                  | Seafood processing → Food and beverage → Agriculture and forestry                  | 0.0040                  | 1.3693                 | 0.0055                 | 29.4                   |
|                          |                         | Seafood processing → Wild fisheries → Agriculture and forestry                     | 0.0037                  | 1.2386                 | 0.0046                 | 24.4                   |
|                          |                         | Seafood processing → Aquaculture → Agriculture and forestry                        | 0.0027                  | 1.3109                 | 0.0036                 | 19.1                   |
|                          |                         | Seafood processing → Aquaculture → Food and beverage → Agriculture and forestry    | 0.0018                  | 1.4722                 | 0.0026                 | 14.0                   |
|                          |                         | Seafood processing → Wild fisheries → Food and beverage → Agriculture and forestry | 0.0011                  | 1.3910                 | 0.0015                 | 8.1                    |
|                          |                         | Seafood processing → Agriculture and forestry                                      | 0.0004                  | 1.2192                 | 0.0005                 | 2.4                    |
| Mineral products         | 0.0015                  | Seafood processing → Mineral products                                              | 0.0008                  | 1.1012                 | 0.0009                 | 63.8                   |
|                          |                         | Seafood processing → Wild fisheries → Coal and petroleum → Mineral products        | 0.0001                  | 1.1738                 | 0.0001                 | 7.1                    |
|                          |                         | Seafood processing → Chemical products → Mineral products                          | 0.0000                  | 1.6358                 | 0.0000                 | 2.5                    |
| Seafood processing       | 1.1006                  | Seafood processing → Seafood processing                                            | 0.0913                  | 1.3044                 | 0.1191                 | 10.8                   |
| Food and beverage        | 0.0393                  | Seafood processing → Food and beverage                                             | 0.0163                  | 1.3044                 | 0.0212                 | 54.0                   |
|                          |                         | Seafood processing → Aquaculture → Food and beverage                               | 0.0072                  | 1.4024                 | 0.0101                 | 25.7                   |
|                          |                         | Seafood processing → Wild fisheries → Food and beverage                            | 0.0044                  | 1.3251                 | 0.0058                 | 14.9                   |
|                          |                         | Seafood processing → Wild fisheries → Agriculture and forestry → Food and beverage | 0.0007                  | 1.3910                 | 0.0009                 | 2.3                    |
| Textile and leather      | 0.0209                  | Seafood processing → Wild fisheries → Textile and leather                          | 0.0068                  | 1.4367                 | 0.0098                 | 46.6                   |
|                          |                         | Seafood processing → Aquaculture → Textile and leather                             | 0.0043                  | 1.5206                 | 0.0065                 | 31.0                   |
|                          |                         | Seafood processing → Textile and leather                                           | 0.0017                  | 1.4143                 | 0.0024                 | 11.4                   |
|                          |                         | Seafood processing → Wholesale and retail → Textile and leather                    | 0.0004                  | 1.4563                 | 0.0006                 | 2.7                    |
| Wood and paper           | 0.0402                  | Seafood processing → Wild fisheries → Wood and paper                               | 0.0142                  | 1.4624                 | 0.0208                 | 51.7                   |
|                          |                         | Seafood processing → Wood and paper                                                | 0.0091                  | 1.4395                 | 0.0130                 | 32.5                   |
|                          |                         | Seafood processing → Wholesale and retail → Wood and paper                         | 0.0010                  | 1.4813                 | 0.0015                 | 3.7                    |
| Printing and copying     | 0.0035                  | Seafood processing → Printing and copying                                          | 0.0011                  | 1.2451                 | 0.0014                 | 39.6                   |
|                          |                         | Seafood processing → Wholesale and retail → Printing and copying                   | 0.0002                  | 1.2820                 | 0.0002                 | 6.9                    |
|                          |                         | Seafood processing → Finance and insurance → Printing and copying                  | 0.0001                  | 1.6381                 | 0.0001                 | 2.7                    |

|                               |        |                                                                                                         |        |        |        |      |
|-------------------------------|--------|---------------------------------------------------------------------------------------------------------|--------|--------|--------|------|
|                               |        | Seafood processing → Wild fisheries → Wood and paper → Printing and copying                             | 0.0001 | 1.6525 | 0.0001 | 2.5  |
|                               |        | Seafood processing → Office supplies → Printing and copying                                             | 0.0001 | 1.2474 | 0.0001 | 2.4  |
|                               |        | Seafood processing → Wild fisheries → Finance and insurance → Printing and copying                      | 0.0000 | 1.6641 | 0.0001 | 2.3  |
| Coal and petroleum            | 0.1022 | Seafood processing → Wild fisheries → Coal and petroleum                                                | 0.0487 | 1.1734 | 0.0571 | 55.9 |
|                               |        | Seafood processing → Transportation → Coal and petroleum                                                | 0.0076 | 1.2170 | 0.0093 | 9.1  |
|                               |        | Seafood processing → Coal and petroleum                                                                 | 0.0072 | 1.1551 | 0.0084 | 8.2  |
|                               |        | Seafood processing → Chemical products → Coal and petroleum                                             | 0.0025 | 1.7086 | 0.0043 | 4.2  |
|                               |        | Seafood processing → Aquaculture → Coal and petroleum                                                   | 0.0029 | 1.2419 | 0.0036 | 3.5  |
|                               |        | Seafood processing → Wild fisheries → Transportation → Coal and petroleum                               | 0.0027 | 1.2363 | 0.0034 | 3.3  |
|                               |        | Seafood processing → Wholesale and retail → Coal and petroleum                                          | 0.0022 | 1.1891 | 0.0026 | 2.6  |
| Chemical products             | 0.0885 | Seafood processing → Chemical products                                                                  | 0.0257 | 1.6351 | 0.0419 | 47.4 |
|                               |        | Seafood processing → Wild fisheries → Chemical products                                                 | 0.0103 | 1.6610 | 0.0170 | 19.3 |
|                               |        | Seafood processing → Aquaculture → Chemical products                                                    | 0.0027 | 1.7580 | 0.0048 | 5.4  |
|                               |        | Seafood processing → Wild fisheries → Wood and paper → Chemical products                                | 0.0010 | 2.1705 | 0.0021 | 2.3  |
|                               |        | Seafood processing → Wild fisheries → Coal and petroleum → Chemical products                            | 0.0012 | 1.7356 | 0.0020 | 2.3  |
| Non-metallic mineral products | 0.0021 | Seafood processing → Chemical products → Non-metallic mineral products                                  | 0.0001 | 1.8070 | 0.0002 | 8.3  |
|                               |        | Seafood processing → Wild fisheries → Electric and electronic equipment → Non-metallic mineral products | 0.0001 | 1.6652 | 0.0001 | 6.9  |
|                               |        | Seafood processing → Food and beverage → Non-metallic mineral products                                  | 0.0001 | 1.4420 | 0.0001 | 6.2  |
|                               |        | Seafood processing → Non-metallic mineral products                                                      | 0.0001 | 1.2167 | 0.0001 | 5.6  |
|                               |        | Seafood processing → Wild fisheries → Wood and paper → Non-metallic mineral products                    | 0.0001 | 1.6164 | 0.0001 | 4.4  |
|                               |        | Seafood processing → Wild fisheries → Non-metallic mineral products                                     | 0.0001 | 1.2360 | 0.0001 | 4.1  |
|                               |        | Seafood processing → Wild fisheries → Chemical products → Non-metallic mineral products                 | 0.0000 | 1.8356 | 0.0001 | 3.4  |
|                               |        | Seafood processing → Aquaculture → Food and beverage → Non-metallic mineral products                    | 0.0000 | 1.5503 | 0.0001 | 3.0  |
|                               |        | Seafood processing → Wild fisheries → Transport equipment → Non-metallic mineral products               | 0.0000 | 1.7121 | 0.0001 | 2.8  |
|                               |        | Seafood processing → Wood and paper → Non-metallic mineral products                                     | 0.0000 | 1.5912 | 0.0001 | 2.7  |
| Primary metal products        | 0.0198 | Seafood processing → Metal products → Primary metal products                                            | 0.0021 | 2.4026 | 0.0049 | 25.0 |
|                               |        | Seafood processing → Wild fisheries → Transport equipment → Primary metal products                      | 0.0007 | 2.9408 | 0.0020 | 10.1 |

|                                   |        |                                                                                                                     |        |        |        |      |
|-----------------------------------|--------|---------------------------------------------------------------------------------------------------------------------|--------|--------|--------|------|
|                                   |        | Seafood processing → Wild fisheries → General machinery → Primary metal products                                    | 0.0005 | 2.5930 | 0.0012 | 6.0  |
|                                   |        | Seafood processing → Wild fisheries → Primary metal products                                                        | 0.0004 | 2.1236 | 0.0008 | 4.1  |
|                                   |        | Seafood processing → General machinery → Primary metal products                                                     | 0.0003 | 2.5526 | 0.0008 | 4.0  |
|                                   |        | Seafood processing → Aquaculture → Transport equipment → Primary metal products                                     | 0.0002 | 3.1125 | 0.0006 | 3.0  |
|                                   |        | Seafood processing → Transportation → Transport equipment → Primary metal products                                  | 0.0001 | 3.0552 | 0.0004 | 2.3  |
|                                   |        | Seafood processing → Primary metal products                                                                         | 0.0000 | 2.0905 | 0.0000 | 0.0  |
| Metal products                    | 0.0151 | Seafood processing → Metal products                                                                                 | 0.0068 | 1.2691 | 0.0087 | 57.6 |
|                                   |        | Seafood processing → Wild fisheries → Transport equipment → Metal products                                          | 0.0003 | 1.7855 | 0.0005 | 3.4  |
|                                   |        | Seafood processing → Wild fisheries → Coal and petroleum → Metal products                                           | 0.0003 | 1.3524 | 0.0004 | 2.9  |
|                                   |        | Seafood processing → Wild fisheries → Metal products                                                                | 0.0003 | 1.2892 | 0.0004 | 2.4  |
|                                   |        | Seafood processing → Food and beverage → Metal products                                                             | 0.0002 | 1.5041 | 0.0003 | 2.2  |
|                                   |        | Seafood processing → Chemical products → Metal products                                                             | 0.0002 | 1.8838 | 0.0003 | 2.1  |
|                                   |        | Seafood processing → Wild fisheries → General machinery → Metal products                                            | 0.0002 | 1.5739 | 0.0003 | 2.1  |
| General machinery                 | 0.0121 | Seafood processing → Wild fisheries → General machinery                                                             | 0.0031 | 1.3680 | 0.0043 | 35.2 |
|                                   |        | Seafood processing → General machinery                                                                              | 0.0021 | 1.3467 | 0.0028 | 23.4 |
|                                   |        | Seafood processing → Wild fisheries → Transport equipment → General machinery                                       | 0.0003 | 1.8940 | 0.0006 | 5.1  |
|                                   |        | Seafood processing → Aquaculture → General machinery                                                                | 0.0003 | 1.4478 | 0.0004 | 3.3  |
|                                   |        | Seafood processing → Wild fisheries → Coal and petroleum → General machinery                                        | 0.0003 | 1.4353 | 0.0004 | 3.2  |
|                                   |        | Seafood processing → Chemical products → General machinery                                                          | 0.0002 | 1.9992 | 0.0004 | 3.2  |
| Electric and electronic equipment | 0.0130 | Seafood processing → Wild fisheries → Electric and electronic equipment                                             | 0.0036 | 1.5068 | 0.0054 | 41.7 |
|                                   |        | Seafood processing → Electric and electronic equipment                                                              | 0.0006 | 1.4833 | 0.0008 | 6.4  |
|                                   |        | Seafood processing → Wild fisheries → Transport equipment → Electric and electronic equipment                       | 0.0003 | 2.0873 | 0.0006 | 4.8  |
|                                   |        | Seafood processing → Wholesale and retail → Electric and electronic equipment                                       | 0.0004 | 1.5270 | 0.0006 | 4.3  |
|                                   |        | Seafood processing → Wild fisheries → General machinery → Electric and electronic equipment                         | 0.0002 | 1.8410 | 0.0003 | 2.4  |
|                                   |        | Seafood processing → Wholesale and retail → Telecommunications and broadcasting → Electric and electronic equipment | 0.0002 | 1.7507 | 0.0003 | 2.3  |
| Precision instruments             | 0.0015 | Seafood processing → Wild fisheries → Precision instruments                                                         | 0.0005 | 1.1725 | 0.0006 | 39.2 |
|                                   |        | Seafood processing → Precision instruments                                                                          | 0.0001 | 1.1542 | 0.0001 | 8.2  |
|                                   |        | Seafood processing → Wild fisheries → Coal and petroleum → Precision instruments                                    | 0.0000 | 1.2305 | 0.0001 | 3.5  |



|                             |        |                                                                                                 |        |        |        |      |
|-----------------------------|--------|-------------------------------------------------------------------------------------------------|--------|--------|--------|------|
|                             |        | Seafood processing → Wild fisheries → General machinery → Precision instruments                 | 0.0000 | 1.4343 | 0.0000 | 3.0  |
|                             |        | Seafood processing → Wild fisheries → Transport equipment → Precision instruments               | 0.0000 | 1.6243 | 0.0000 | 2.8  |
|                             |        | Seafood processing → Wild fisheries → Electric and electronic equipment → Precision instruments | 0.0000 | 1.5785 | 0.0000 | 2.1  |
|                             |        | Seafood processing → Wholesale and retail → Precision instruments                               | 0.0000 | 1.1887 | 0.0000 | 2.0  |
|                             |        | Seafood processing → General machinery → Precision instruments                                  | 0.0000 | 1.4119 | 0.0000 | 2.0  |
| Transport equipment         | 0.0291 | Seafood processing → Wild fisheries → Transport equipment                                       | 0.0097 | 1.5490 | 0.0150 | 51.6 |
|                             |        | Seafood processing → Aquaculture → Transport equipment                                          | 0.0027 | 1.6394 | 0.0045 | 15.5 |
|                             |        | Seafood processing → Transportation → Transport equipment                                       | 0.0021 | 1.6094 | 0.0034 | 11.6 |
|                             |        | Seafood processing → Transport equipment                                                        | 0.0012 | 1.5248 | 0.0018 | 6.3  |
|                             |        | Seafood processing → Wild fisheries → Transportation → Transport equipment                      | 0.0008 | 1.6349 | 0.0012 | 4.2  |
| Other manufacturing         | 0.0019 | Seafood processing → Wild fisheries → Transport equipment → Other manufacturing                 | 0.0002 | 1.6730 | 0.0003 | 15.4 |
|                             |        | Seafood processing → Wild fisheries → Other manufacturing                                       | 0.0002 | 1.2078 | 0.0002 | 10.3 |
|                             |        | Seafood processing → Wholesale and retail → Other manufacturing                                 | 0.0001 | 1.2243 | 0.0002 | 9.1  |
|                             |        | Seafood processing → Aquaculture → Transport equipment → Other manufacturing                    | 0.0000 | 1.7707 | 0.0001 | 4.6  |
|                             |        | Seafood processing → Office supplies → Other manufacturing                                      | 0.0001 | 1.1916 | 0.0001 | 4.6  |
|                             |        | Seafood processing → Other manufacturing                                                        | 0.0001 | 1.1889 | 0.0001 | 4.4  |
|                             |        | Seafood processing → Wild fisheries → Textile and leather → Other manufacturing                 | 0.0001 | 1.5504 | 0.0001 | 4.3  |
|                             |        | Seafood processing → Transportation → Transport equipment → Other manufacturing                 | 0.0000 | 1.7382 | 0.0001 | 3.5  |
|                             |        | Seafood processing → Aquaculture → Textile and leather → Other manufacturing                    | 0.0000 | 1.6409 | 0.0001 | 2.9  |
| Electricity, gas, and water | 0.0248 | Seafood processing → Electricity, gas, and water                                                | 0.0057 | 1.3283 | 0.0076 | 30.8 |
|                             |        | Seafood processing → Wholesale and retail → Electricity, gas, and water                         | 0.0018 | 1.3678 | 0.0024 | 9.7  |
|                             |        | Seafood processing → Aquaculture → Electricity, gas, and water                                  | 0.0014 | 1.4281 | 0.0020 | 8.1  |
|                             |        | Seafood processing → Wild fisheries → Coal and petroleum → Electricity, gas, and water          | 0.0007 | 1.4149 | 0.0011 | 4.3  |
|                             |        | Seafood processing → Wild fisheries → Wood and paper → Electricity, gas, and water              | 0.0005 | 1.7648 | 0.0009 | 3.5  |
|                             |        | Seafood processing → Chemical products → Electricity, gas, and water                            | 0.0004 | 1.9723 | 0.0007 | 3.0  |
|                             |        | Seafood processing → Transportation → Electricity, gas, and water                               | 0.0005 | 1.4039 | 0.0007 | 2.7  |
|                             |        | Seafood processing → Wood and paper → Electricity, gas, and water                               | 0.0003 | 1.7373 | 0.0006 | 2.2  |
|                             |        | Seafood processing → Wild fisheries → Electricity, gas, and water                               | 0.0004 | 1.3494 | 0.0005 | 2.2  |
| Construction                | 0.0026 | Seafood processing → Real estate and business services → Construction                           | 0.0002 | 1.2069 | 0.0003 | 11.5 |

|                                     |        |                                                                                                                     |        |        |        |      |
|-------------------------------------|--------|---------------------------------------------------------------------------------------------------------------------|--------|--------|--------|------|
|                                     |        | Seafood processing → Wholesale and retail → Real estate and business services → Construction                        | 0.0002 | 1.2403 | 0.0003 | 10.8 |
|                                     |        | Seafood processing → Aquaculture → Construction                                                                     | 0.0002 | 1.1872 | 0.0003 | 10.7 |
|                                     |        | Seafood processing → Wild fisheries → Real estate and business services → Construction                              | 0.0002 | 1.2260 | 0.0002 | 9.1  |
|                                     |        | Seafood processing → Construction                                                                                   | 0.0002 | 1.1042 | 0.0002 | 8.0  |
|                                     |        | Seafood processing → Wholesale and retail → Construction                                                            | 0.0001 | 1.1370 | 0.0001 | 5.0  |
|                                     |        | Seafood processing → Wild fisheries → Construction                                                                  | 0.0001 | 1.1217 | 0.0001 | 3.0  |
|                                     |        | Seafood processing → Transportation → Real estate and business services → Construction                              | 0.0000 | 1.2745 | 0.0001 | 2.1  |
| Wholesale and retail                | 0.1220 | Seafood processing → Wholesale and retail                                                                           | 0.0835 | 1.1336 | 0.0946 | 77.6 |
|                                     |        | Seafood processing → Wild fisheries → Wholesale and retail                                                          | 0.0082 | 1.1516 | 0.0095 | 7.8  |
|                                     |        | Seafood processing → Aquaculture → Wholesale and retail                                                             | 0.0028 | 1.2188 | 0.0034 | 2.8  |
| Transportation                      | 0.0847 | Seafood processing → Transportation                                                                                 | 0.0411 | 1.1634 | 0.0478 | 56.4 |
|                                     |        | Seafood processing → Wild fisheries → Transportation                                                                | 0.0148 | 1.1818 | 0.0174 | 20.6 |
|                                     |        | Seafood processing → Wholesale and retail → Transportation                                                          | 0.0062 | 1.1960 | 0.0074 | 8.7  |
| Telecommunications and broadcasting | 0.0156 | Seafood processing → Wholesale and retail → Telecommunications and broadcasting                                     | 0.0042 | 1.3002 | 0.0055 | 35.1 |
|                                     |        | Seafood processing → Telecommunications and broadcasting                                                            | 0.0023 | 1.2710 | 0.0029 | 18.5 |
|                                     |        | Seafood processing → Wild fisheries → Telecommunications and broadcasting                                           | 0.0004 | 1.2912 | 0.0006 | 3.6  |
|                                     |        | Seafood processing → Wild fisheries → Wholesale and retail → Telecommunications and broadcasting                    | 0.0004 | 1.3208 | 0.0005 | 3.5  |
|                                     |        | Seafood processing → Finance and insurance → Telecommunications and broadcasting                                    | 0.0002 | 1.6703 | 0.0004 | 2.6  |
|                                     |        | Seafood processing → Aquaculture → Telecommunications and broadcasting                                              | 0.0003 | 1.3665 | 0.0004 | 2.6  |
|                                     |        | Seafood processing → Real estate and business services → Telecommunications and broadcasting                        | 0.0003 | 1.3849 | 0.0004 | 2.3  |
|                                     |        | Seafood processing → Wild fisheries → Finance and insurance → Telecommunications and broadcasting                   | 0.0002 | 1.6968 | 0.0003 | 2.2  |
|                                     |        | Seafood processing → Wholesale and retail → Real estate and business services → Telecommunications and broadcasting | 0.0002 | 1.4145 | 0.0003 | 2.2  |
| Finance and insurance               | 0.0479 | Seafood processing → Finance and insurance                                                                          | 0.0101 | 1.4484 | 0.0146 | 30.5 |
|                                     |        | Seafood processing → Wild fisheries → Finance and insurance                                                         | 0.0086 | 1.4713 | 0.0126 | 26.3 |
|                                     |        | Seafood processing → Wholesale and retail → Finance and insurance                                                   | 0.0026 | 1.4910 | 0.0039 | 8.2  |
|                                     |        | Seafood processing → Aquaculture → Finance and insurance                                                            | 0.0017 | 1.5572 | 0.0027 | 5.7  |
|                                     |        | Seafood processing → Transportation → Finance and insurance                                                         | 0.0013 | 1.5298 | 0.0019 | 4.0  |

|                                   |        |                                                                                                             |        |        |        |      |
|-----------------------------------|--------|-------------------------------------------------------------------------------------------------------------|--------|--------|--------|------|
| Real estate and business services | 0.0574 | Seafood processing → Real estate and business services                                                      | 0.0098 | 1.2060 | 0.0119 | 20.6 |
|                                   |        | Seafood processing → Wholesale and retail → Real estate and business services                               | 0.0089 | 1.2395 | 0.0111 | 19.3 |
|                                   |        | Seafood processing → Wild fisheries → Real estate and business services                                     | 0.0076 | 1.2251 | 0.0094 | 16.3 |
|                                   |        | Seafood processing → Transportation → Real estate and business services                                     | 0.0017 | 1.2736 | 0.0021 | 3.7  |
|                                   |        | Seafood processing → Chemical products → Real estate and business services                                  | 0.0007 | 1.7901 | 0.0013 | 2.2  |
|                                   |        | Seafood processing → Finance and insurance → Real estate and business services                              | 0.0008 | 1.5762 | 0.0012 | 2.1  |
| Public administration and defense | 0.0006 | Seafood processing → Transportation → Public administration and defense                                     | 0.0003 | 1.1634 | 0.0003 | 56.4 |
|                                   |        | Seafood processing → Wild fisheries → Transportation → Public administration and defense                    | 0.0001 | 1.1818 | 0.0001 | 20.6 |
|                                   |        | Seafood processing → Wholesale and retail → Transportation → Public administration and defense              | 0.0000 | 1.1960 | 0.0001 | 8.7  |
| Educational and health services   | 0.0079 | Seafood processing → Educational and health services                                                        | 0.0019 | 1.1235 | 0.0021 | 27.2 |
|                                   |        | Seafood processing → Aquaculture → Educational and health services                                          | 0.0014 | 1.2079 | 0.0018 | 22.2 |
|                                   |        | Seafood processing → Wild fisheries → Educational and health services                                       | 0.0011 | 1.1413 | 0.0012 | 15.5 |
|                                   |        | Seafood processing → Wholesale and retail → Educational and health services                                 | 0.0005 | 1.1570 | 0.0006 | 7.3  |
|                                   |        | Seafood processing → Transportation → Educational and health services                                       | 0.0002 | 1.1875 | 0.0002 | 2.4  |
| Social and other services         | 0.0047 | Seafood processing → Social and other services                                                              | 0.0008 | 1.1559 | 0.0009 | 18.8 |
|                                   |        | Seafood processing → Wild fisheries → Social and other services                                             | 0.0004 | 1.1742 | 0.0005 | 10.8 |
|                                   |        | Seafood processing → Wholesale and retail → Social and other services                                       | 0.0003 | 1.1902 | 0.0004 | 8.6  |
|                                   |        | Seafood processing → Transportation → Social and other services                                             | 0.0003 | 1.2216 | 0.0003 | 6.9  |
|                                   |        | Seafood processing → Real estate and business services → Social and other services                          | 0.0001 | 1.2640 | 0.0002 | 3.5  |
|                                   |        | Seafood processing → Aquaculture → Social and other services                                                | 0.0001 | 1.2428 | 0.0002 | 3.4  |
|                                   |        | Seafood processing → Wholesale and retail → Telecommunications and broadcasting → Social and other services | 0.0001 | 1.3641 | 0.0002 | 3.3  |
|                                   |        | Seafood processing → Wholesale and retail → Real estate and business services → Social and other services   | 0.0001 | 1.2988 | 0.0002 | 3.3  |
|                                   |        | Seafood processing → Wild fisheries → Real estate and business services → Social and other services         | 0.0001 | 1.2840 | 0.0001 | 2.8  |
|                                   |        | Seafood processing → Wild fisheries → Transportation → Social and other services                            | 0.0001 | 1.2410 | 0.0001 | 2.5  |
| Office supplies                   | 0.0018 | Seafood processing → Office supplies                                                                        | 0.0006 | 1.1034 | 0.0007 | 36.5 |
|                                   |        | Seafood processing → Wholesale and retail → Office supplies                                                 | 0.0001 | 1.1358 | 0.0002 | 9.1  |
|                                   |        | Seafood processing → Wild fisheries → Office supplies                                                       | 0.0001 | 1.1209 | 0.0002 | 8.7  |

|  |  |                                                                          |        |        |        |     |
|--|--|--------------------------------------------------------------------------|--------|--------|--------|-----|
|  |  | Seafood processing → Aquaculture → Office supplies                       | 0.0001 | 1.1864 | 0.0001 | 7.9 |
|  |  | Seafood processing → Real estate and business services → Office supplies | 0.0000 | 1.2088 | 0.0000 | 2.0 |

**Table B.4 Forward linkage SPA: Wild fisheries**

| <b>Destination</b>       | <b>Global Influence</b> | <b>Elementary Paths</b>                                                                               | <b>Direct Influence</b> | <b>Path Multiplier</b> | <b>Total Influence</b> | <b>TG ratio (in %)</b> |
|--------------------------|-------------------------|-------------------------------------------------------------------------------------------------------|-------------------------|------------------------|------------------------|------------------------|
| Wild fisheries           | 1.0159                  | Wild fisheries → Wild fisheries                                                                       | 0.0156                  | 1.0922                 | 0.0170                 | 1.7                    |
| Aquaculture              | 0.0002                  | Wild fisheries → Aquaculture                                                                          | 0.0001                  | 1.0922                 | 0.0001                 | 63.0                   |
|                          |                         | Wild fisheries → Seafood processing → Food and beverage → Aquaculture                                 | 0.0000                  | 1.4246                 | 0.0001                 | 25.2                   |
|                          |                         | Wild fisheries → Food and beverage → Aquaculture                                                      | 0.0000                  | 1.2946                 | 0.0000                 | 8.6                    |
| Agriculture and forestry | 0.0028                  | Wild fisheries → Seafood processing → Food and beverage → Agriculture and forestry                    | 0.0015                  | 1.3910                 | 0.0021                 | 73.8                   |
|                          |                         | Wild fisheries → Food and beverage → Agriculture and forestry                                         | 0.0006                  | 1.2640                 | 0.0007                 | 25.3                   |
| Mineral products         | 0.0000                  | Wild fisheries → Seafood processing → Chemical products → Mineral products                            | 0.0000                  | 1.6617                 | 0.0000                 | 13.2                   |
|                          |                         | Wild fisheries → Other manufacturing → Transport equipment → Mineral products                         | 0.0000                  | 1.5208                 | 0.0000                 | 9.3                    |
|                          |                         | Wild fisheries → Real estate and business services → Mineral products                                 | 0.0000                  | 1.1137                 | 0.0000                 | 8.6                    |
|                          |                         | Wild fisheries → Seafood processing → Real estate and business services → Mineral products            | 0.0000                  | 1.2257                 | 0.0000                 | 7.1                    |
|                          |                         | Wild fisheries → Chemical products → Mineral products                                                 | 0.0000                  | 1.5099                 | 0.0000                 | 5.6                    |
|                          |                         | Wild fisheries → Seafood processing → Food and beverage → Agriculture and forestry → Mineral products | 0.0000                  | 1.3917                 | 0.0000                 | 4.6                    |
|                          |                         | Wild fisheries → Seafood processing → Food and beverage → Chemical products → Mineral products        | 0.0000                  | 1.9689                 | 0.0000                 | 4.4                    |
|                          |                         | Wild fisheries → Real estate and business services → Transportation → Mineral products                | 0.0000                  | 1.1760                 | 0.0000                 | 2.2                    |
| Seafood processing       | 0.5065                  | Wild fisheries → Seafood processing                                                                   | 0.4529                  | 1.1181                 | 0.5064                 | 100.0                  |
| Food and beverage        | 0.0313                  | Wild fisheries → Seafood processing → Food and beverage                                               | 0.0176                  | 1.3251                 | 0.0233                 | 74.3                   |
|                          |                         | Wild fisheries → Food and beverage                                                                    | 0.0066                  | 1.2041                 | 0.0080                 | 25.4                   |
| Textile and leather      | 0.0001                  | Wild fisheries → Other manufacturing → Textile and leather                                            | 0.0000                  | 1.4087                 | 0.0000                 | 27.5                   |
|                          |                         | Wild fisheries → Seafood processing → Chemical products → Textile and leather                         | 0.0000                  | 2.1323                 | 0.0000                 | 15.5                   |
|                          |                         | Wild fisheries → Seafood processing → Food and beverage → Textile and leather                         | 0.0000                  | 1.7028                 | 0.0000                 | 14.3                   |
|                          |                         | Wild fisheries → Chemical products → Textile and leather                                              | 0.0000                  | 1.9375                 | 0.0000                 | 6.6                    |
|                          |                         | Wild fisheries → Real estate and business services → Textile and leather                              | 0.0000                  | 1.4302                 | 0.0000                 | 5.6                    |
|                          |                         | Wild fisheries → Seafood processing → Food and beverage → Chemical products → Textile and leather     | 0.0000                  | 2.5265                 | 0.0000                 | 5.2                    |
|                          |                         | Wild fisheries → Food and beverage → Textile and leather                                              | 0.0000                  | 1.5473                 | 0.0000                 | 4.9                    |
|                          |                         | Wild fisheries → Seafood processing → Real estate and business services → Textile and leather         | 0.0000                  | 1.5741                 | 0.0000                 | 4.6                    |

|                      |          |                                                                                                                            |        |        |        |      |
|----------------------|----------|----------------------------------------------------------------------------------------------------------------------------|--------|--------|--------|------|
|                      |          | Wild fisheries → Textile and leather                                                                                       | 0.0000 | 1.3054 | 0.0000 | 1.0  |
| Wood and paper       | 0.0000   | Wild fisheries → Seafood processing → Food and beverage → Wood and paper                                                   | 0.0000 | 1.7330 | 0.0000 | 21.5 |
|                      |          | Wild fisheries → Seafood processing → Food and beverage → Agriculture and forestry → Wood and paper                        | 0.0000 | 1.8191 | 0.0000 | 18.8 |
|                      |          | Wild fisheries → Seafood processing → Chemical products → Wood and paper                                                   | 0.0000 | 2.1705 | 0.0000 | 12.0 |
|                      |          | Wild fisheries → Food and beverage → Wood and paper                                                                        | 0.0000 | 1.5748 | 0.0000 | 7.4  |
|                      |          | Wild fisheries → Food and beverage → Agriculture and forestry → Wood and paper                                             | 0.0000 | 1.6530 | 0.0000 | 6.4  |
|                      |          | Wild fisheries → Chemical products → Wood and paper                                                                        | 0.0000 | 1.9721 | 0.0000 | 5.1  |
|                      |          | Wild fisheries → Real estate and business services → Wood and paper                                                        | 0.0000 | 1.4556 | 0.0000 | 4.0  |
|                      |          | Wild fisheries → Seafood processing → Food and beverage → Chemical products → Wood and paper                               | 0.0000 | 2.5716 | 0.0000 | 4.0  |
|                      |          | Wild fisheries → Seafood processing → Real estate and business services → Wood and paper                                   | 0.0000 | 1.6020 | 0.0000 | 3.3  |
| Printing and copying | 0.0000   | Wild fisheries → Seafood processing → Chemical products → Printing and copying                                             | 0.0000 | 1.8784 | 0.0000 | 15.0 |
|                      |          | Wild fisheries → Real estate and business services → Printing and copying                                                  | 0.0000 | 1.2586 | 0.0000 | 9.5  |
|                      |          | Wild fisheries → Social and other services → Printing and copying                                                          | 0.0000 | 1.2062 | 0.0000 | 8.8  |
|                      |          | Wild fisheries → Seafood processing → Real estate and business services → Printing and copying                             | 0.0000 | 1.3851 | 0.0000 | 7.8  |
|                      |          | Wild fisheries → Chemical products → Printing and copying                                                                  | 0.0000 | 1.7067 | 0.0000 | 6.3  |
|                      |          | Wild fisheries → Seafood processing → Food and beverage → Chemical products → Printing and copying                         | 0.0000 | 2.2257 | 0.0000 | 5.0  |
|                      |          | Wild fisheries → Seafood processing → Food and beverage → Wood and paper → Printing and copying                            | 0.0000 | 1.9583 | 0.0000 | 4.6  |
|                      |          | Wild fisheries → Seafood processing → Food and beverage → Agriculture and forestry → Wood and paper → Printing and copying | 0.0000 | 2.0556 | 0.0000 | 4.0  |
|                      |          | Wild fisheries → Seafood processing → Chemical products → Wood and paper → Printing and copying                            | 0.0000 | 2.4520 | 0.0000 | 2.6  |
|                      |          | Wild fisheries → Seafood processing → Social and other services → Printing and copying                                     | 0.0000 | 1.3275 | 0.0000 | 2.6  |
|                      |          | Wild fisheries → Other manufacturing → Office supplies → Printing and copying                                              | 0.0000 | 1.2433 | 0.0000 | 2.4  |
| Coal and petroleum   | 4.75E-05 | Wild fisheries → Seafood processing → Chemical products → Coal and petroleum                                               | 0.0000 | 1.7356 | 0.0000 | 21.7 |
|                      |          | Wild fisheries → Real estate and business services → Coal and petroleum                                                    | 0.0000 | 1.1678 | 0.0000 | 15.5 |
|                      |          | Wild fisheries → Seafood processing → Real estate and business services → Coal and petroleum                               | 0.0000 | 1.2852 | 0.0000 | 12.7 |
|                      |          | Wild fisheries → Chemical products → Coal and petroleum                                                                    | 0.0000 | 1.5770 | 0.0000 | 9.2  |
|                      |          | Wild fisheries → Seafood processing → Food and beverage → Chemical products → Coal and petroleum                           | 0.0000 | 2.0565 | 0.0000 | 7.2  |

|                               |        |                                                                                                                         |        |        |        |      |
|-------------------------------|--------|-------------------------------------------------------------------------------------------------------------------------|--------|--------|--------|------|
|                               |        | Wild fisheries → Food and beverage → Chemical products → Coal and petroleum                                             | 0.0000 | 1.8688 | 0.0000 | 2.5  |
|                               |        | Wild fisheries → Seafood processing → Food and beverage → Coal and petroleum                                            | 0.0000 | 1.3907 | 0.0000 | 2.2  |
| Chemical products             | 0.0013 | Wild fisheries → Seafood processing → Chemical products                                                                 | 0.0004 | 1.6610 | 0.0006 | 48.2 |
|                               |        | Wild fisheries → Chemical products                                                                                      | 0.0002 | 1.5092 | 0.0003 | 20.3 |
|                               |        | Wild fisheries → Seafood processing → Food and beverage → Chemical products                                             | 0.0001 | 1.9681 | 0.0002 | 16.0 |
|                               |        | Wild fisheries → Food and beverage → Chemical products                                                                  | 0.0000 | 1.7884 | 0.0001 | 5.5  |
|                               |        | Wild fisheries → Real estate and business services → Chemical products                                                  | 0.0000 | 1.6523 | 0.0000 | 2.2  |
| Non-metallic mineral products | 0.0000 | Wild fisheries → Real estate and business services → Non-metallic mineral products                                      | 0.0000 | 1.2303 | 0.0000 | 12.1 |
|                               |        | Wild fisheries → Seafood processing → Chemical products → Non-metallic mineral products                                 | 0.0000 | 1.8356 | 0.0000 | 11.4 |
|                               |        | Wild fisheries → Seafood processing → Real estate and business services → Non-metallic mineral products                 | 0.0000 | 1.3540 | 0.0000 | 9.9  |
|                               |        | Wild fisheries → Seafood processing → Food and beverage → Non-metallic mineral products                                 | 0.0000 | 1.4648 | 0.0000 | 8.0  |
|                               |        | Wild fisheries → Chemical products → Non-metallic mineral products                                                      | 0.0000 | 1.6679 | 0.0000 | 4.8  |
|                               |        | Wild fisheries → Seafood processing → Food and beverage → Chemical products → Non-metallic mineral products             | 0.0000 | 2.1750 | 0.0000 | 3.8  |
|                               |        | Wild fisheries → Food and beverage → Non-metallic mineral products                                                      | 0.0000 | 1.3311 | 0.0000 | 2.7  |
| Primary metal products        | 0.0001 | Wild fisheries → Real estate and business services → Primary metal products                                             | 0.0000 | 2.1136 | 0.0000 | 20.8 |
|                               |        | Wild fisheries → Seafood processing → Real estate and business services → Primary metal products                        | 0.0000 | 2.3262 | 0.0000 | 17.0 |
|                               |        | Wild fisheries → Seafood processing → Chemical products → Primary metal products                                        | 0.0000 | 3.1540 | 0.0000 | 9.5  |
|                               |        | Wild fisheries → Chemical products → Primary metal products                                                             | 0.0000 | 2.8658 | 0.0000 | 4.0  |
|                               |        | Wild fisheries → Seafood processing → Food and beverage → Chemical products → Primary metal products                    | 0.0000 | 3.7371 | 0.0000 | 3.2  |
|                               |        | Wild fisheries → Real estate and business services → Wholesale and retail → Primary metal products                      | 0.0000 | 2.1721 | 0.0000 | 2.6  |
|                               |        | Wild fisheries → Seafood processing → Real estate and business services → Wholesale and retail → Primary metal products | 0.0000 | 2.3905 | 0.0000 | 2.1  |
| Metal products                | 0.0000 | Wild fisheries → Seafood processing → Chemical products → Metal products                                                | 0.0000 | 1.9137 | 0.0000 | 18.0 |
|                               |        | Wild fisheries → Real estate and business services → Metal products                                                     | 0.0000 | 1.2831 | 0.0000 | 10.0 |
|                               |        | Wild fisheries → Seafood processing → Real estate and business services → Metal products                                | 0.0000 | 1.4122 | 0.0000 | 8.2  |
|                               |        | Wild fisheries → Chemical products → Metal products                                                                     | 0.0000 | 1.7388 | 0.0000 | 7.6  |
|                               |        | Wild fisheries → Seafood processing → Food and beverage → Chemical products → Metal products                            | 0.0000 | 2.2675 | 0.0000 | 6.0  |

|                                   |        |                                                                                                                   |        |        |        |      |
|-----------------------------------|--------|-------------------------------------------------------------------------------------------------------------------|--------|--------|--------|------|
|                                   |        | Wild fisheries → Real estate and business services → Primary metal products → Metal products                      | 0.0000 | 2.4286 | 0.0000 | 4.1  |
|                                   |        | Wild fisheries → Seafood processing → Real estate and business services → Primary metal products → Metal products | 0.0000 | 2.6729 | 0.0000 | 3.4  |
|                                   |        | Wild fisheries → Food and beverage → Chemical products → Metal products                                           | 0.0000 | 2.0605 | 0.0000 | 2.1  |
| General machinery                 | 0.0001 | Wild fisheries → Real estate and business services → General machinery                                            | 0.0000 | 1.3615 | 0.0000 | 16.2 |
|                                   |        | Wild fisheries → Seafood processing → Real estate and business services → General machinery                       | 0.0000 | 1.4984 | 0.0000 | 13.3 |
|                                   |        | Wild fisheries → Seafood processing → Chemical products → General machinery                                       | 0.0000 | 2.0308 | 0.0000 | 11.1 |
|                                   |        | Wild fisheries → Chemical products → General machinery                                                            | 0.0000 | 1.8452 | 0.0000 | 4.7  |
|                                   |        | Wild fisheries → Seafood processing → Food and beverage → Chemical products → General machinery                   | 0.0000 | 2.4063 | 0.0000 | 3.7  |
|                                   |        | Wild fisheries → Other manufacturing → General machinery                                                          | 0.0000 | 1.3427 | 0.0000 | 2.9  |
| Electric and electronic equipment | 0.0003 | Wild fisheries → Real estate and business services → Electric and electronic equipment                            | 0.0000 | 1.4976 | 0.0001 | 24.8 |
|                                   |        | Wild fisheries → Seafood processing → Real estate and business services → Electric and electronic equipment       | 0.0000 | 1.6482 | 0.0001 | 20.3 |
|                                   |        | Wild fisheries → Seafood processing → Chemical products → Electric and electronic equipment                       | 0.0000 | 2.2379 | 0.0000 | 14.6 |
|                                   |        | Wild fisheries → Chemical products → Electric and electronic equipment                                            | 0.0000 | 2.0334 | 0.0000 | 6.2  |
|                                   |        | Wild fisheries → Seafood processing → Food and beverage → Chemical products → Electric and electronic equipment   | 0.0000 | 2.6516 | 0.0000 | 4.9  |
| Precision instruments             | 0.0000 | Wild fisheries → Real estate and business services → Precision instruments                                        | 0.0000 | 1.1669 | 0.0000 | 20.4 |
|                                   |        | Wild fisheries → Seafood processing → Real estate and business services → Precision instruments                   | 0.0000 | 1.2843 | 0.0000 | 16.7 |
|                                   |        | Wild fisheries → Seafood processing → Chemical products → Precision instruments                                   | 0.0000 | 1.7416 | 0.0000 | 16.5 |
|                                   |        | Wild fisheries → Chemical products → Precision instruments                                                        | 0.0000 | 1.5824 | 0.0000 | 7.0  |
|                                   |        | Wild fisheries → Seafood processing → Food and beverage → Chemical products → Precision instruments               | 0.0000 | 2.0636 | 0.0000 | 5.5  |
|                                   |        | Wild fisheries → Other manufacturing → Precision instruments                                                      | 0.0000 | 1.1508 | 0.0000 | 3.3  |
|                                   |        | Wild fisheries → Real estate and business services → Electric and electronic equipment → Precision instruments    | 0.0000 | 1.5684 | 0.0000 | 2.1  |
| Transport equipment               | 0.0005 | Wild fisheries → Other manufacturing → Transport equipment                                                        | 0.0002 | 1.5201 | 0.0003 | 61.3 |
|                                   |        | Wild fisheries → Seafood processing → Chemical products → Transport equipment                                     | 0.0000 | 2.3002 | 0.0000 | 9.0  |
|                                   |        | Wild fisheries → Real estate and business services → Transport equipment                                          | 0.0000 | 1.5417 | 0.0000 | 4.6  |
|                                   |        | Wild fisheries → Chemical products → Transport equipment                                                          | 0.0000 | 2.0900 | 0.0000 | 3.8  |



|                             |        |                                                                                                                 |        |        |        |      |
|-----------------------------|--------|-----------------------------------------------------------------------------------------------------------------|--------|--------|--------|------|
|                             |        | Wild fisheries → Seafood processing → Real estate and business services → Transport equipment                   | 0.0000 | 1.6968 | 0.0000 | 3.7  |
|                             |        | Wild fisheries → Seafood processing → Food and beverage → Chemical products → Transport equipment               | 0.0000 | 2.7254 | 0.0000 | 3.0  |
| Other manufacturing         | 0.0011 | Wild fisheries → Other manufacturing                                                                            | 0.0010 | 1.0974 | 0.0011 | 98.0 |
| Electricity, gas, and water | 0.0000 | Wild fisheries → Real estate and business services → Electricity, gas, and water                                | 0.0000 | 1.3422 | 0.0000 | 26.5 |
|                             |        | Wild fisheries → Seafood processing → Real estate and business services → Electricity, gas, and water           | 0.0000 | 1.4772 | 0.0000 | 21.7 |
|                             |        | Wild fisheries → Seafood processing → Chemical products → Electricity, gas, and water                           | 0.0000 | 2.0036 | 0.0000 | 12.4 |
|                             |        | Wild fisheries → Chemical products → Electricity, gas, and water                                                | 0.0000 | 1.8205 | 0.0000 | 5.2  |
|                             |        | Wild fisheries → Seafood processing → Food and beverage → Chemical products → Electricity, gas, and water       | 0.0000 | 2.3740 | 0.0000 | 4.1  |
| Construction                | 0.0002 | Wild fisheries → Other manufacturing → Construction                                                             | 0.0001 | 1.1010 | 0.0001 | 27.8 |
|                             |        | Wild fisheries → Real estate and business services → Construction                                               | 0.0000 | 1.1140 | 0.0000 | 12.0 |
|                             |        | Wild fisheries → Seafood processing → Real estate and business services → Construction                          | 0.0000 | 1.2260 | 0.0000 | 9.8  |
|                             |        | Wild fisheries → Seafood processing → Food and beverage → Agriculture and forestry → Construction               | 0.0000 | 1.3955 | 0.0000 | 6.4  |
|                             |        | Wild fisheries → Seafood processing → Chemical products → Construction                                          | 0.0000 | 1.6663 | 0.0000 | 6.1  |
|                             |        | Wild fisheries → Chemical products → Construction                                                               | 0.0000 | 1.5140 | 0.0000 | 2.6  |
|                             |        | Wild fisheries → Food and beverage → Agriculture and forestry → Construction                                    | 0.0000 | 1.2681 | 0.0000 | 2.2  |
|                             |        | Wild fisheries → Seafood processing → Food and beverage → Chemical products → Construction                      | 0.0000 | 1.9743 | 0.0000 | 2.0  |
| Wholesale and retail        | 0.0002 | Wild fisheries → Real estate and business services → Wholesale and retail                                       | 0.0000 | 1.1441 | 0.0000 | 30.2 |
|                             |        | Wild fisheries → Seafood processing → Real estate and business services → Wholesale and retail                  | 0.0000 | 1.2591 | 0.0000 | 24.8 |
|                             |        | Wild fisheries → Other manufacturing → Wholesale and retail                                                     | 0.0000 | 1.1300 | 0.0000 | 10.1 |
|                             |        | Wild fisheries → Real estate and business services → Telecommunications and broadcasting → Wholesale and retail | 0.0000 | 1.3056 | 0.0000 | 2.1  |
| Food service                | 0.2704 | Wild fisheries → Food service                                                                                   | 0.1411 | 1.0159 | 0.1433 | 53.0 |
|                             |        | Wild fisheries → Seafood processing → Food service                                                              | 0.1069 | 1.1181 | 0.1195 | 44.2 |
| Transportation              | 0.0001 | Wild fisheries → Real estate and business services → Transportation                                             | 0.0000 | 1.1755 | 0.0000 | 19.5 |
|                             |        | Wild fisheries → Seafood processing → Real estate and business services → Transportation                        | 0.0000 | 1.2938 | 0.0000 | 15.9 |
|                             |        | Wild fisheries → Other manufacturing → Transport equipment → Transportation                                     | 0.0000 | 1.6044 | 0.0000 | 12.8 |
|                             |        | Wild fisheries → Social and other services → Transportation                                                     | 0.0000 | 1.1276 | 0.0000 | 4.2  |

|                                     |        |                                                                                                                        |        |        |        |      |
|-------------------------------------|--------|------------------------------------------------------------------------------------------------------------------------|--------|--------|--------|------|
|                                     |        | Wild fisheries → Seafood processing → Chemical products → Transportation                                               | 0.0000 | 1.7543 | 0.0000 | 3.8  |
|                                     |        | Wild fisheries → Other manufacturing → Transportation                                                                  | 0.0000 | 1.1599 | 0.0000 | 3.4  |
| Telecommunications and broadcasting | 0.0001 | Wild fisheries → Real estate and business services → Telecommunications and broadcasting                               | 0.0000 | 1.2782 | 0.0000 | 28.8 |
|                                     |        | Wild fisheries → Seafood processing → Real estate and business services → Telecommunications and broadcasting          | 0.0000 | 1.4068 | 0.0000 | 23.6 |
|                                     |        | Wild fisheries → Other manufacturing → Telecommunications and broadcasting                                             | 0.0000 | 1.2672 | 0.0000 | 10.7 |
|                                     |        | Wild fisheries → Social and other services → Telecommunications and broadcasting                                       | 0.0000 | 1.2312 | 0.0000 | 8.4  |
|                                     |        | Wild fisheries → Seafood processing → Social and other services → Telecommunications and broadcasting                  | 0.0000 | 1.3550 | 0.0000 | 2.4  |
|                                     |        | Wild fisheries → Real estate and business services → Wholesale and retail → Telecommunications and broadcasting        | 0.0000 | 1.3056 | 0.0000 | 2.4  |
| Finance and insurance               | 0.0001 | Wild fisheries → Real estate and business services → Finance and insurance                                             | 0.0000 | 1.4549 | 0.0000 | 37.5 |
|                                     |        | Wild fisheries → Seafood processing → Real estate and business services → Finance and insurance                        | 0.0000 | 1.6012 | 0.0000 | 30.7 |
|                                     |        | Wild fisheries → Other manufacturing → Finance and insurance                                                           | 0.0000 | 1.4440 | 0.0000 | 8.3  |
|                                     |        | Wild fisheries → Social and other services → Finance and insurance                                                     | 0.0000 | 1.4037 | 0.0000 | 2.0  |
| Real estate and business services   | 0.0015 | Wild fisheries → Real estate and business services                                                                     | 0.0007 | 1.1131 | 0.0007 | 50.6 |
|                                     |        | Wild fisheries → Seafood processing → Real estate and business services                                                | 0.0005 | 1.2251 | 0.0006 | 41.5 |
| Public administration and defense   | 0.0001 | Wild fisheries → Seafood processing → Food and beverage → Agriculture and forestry → Public administration and defense | 0.0000 | 1.3912 | 0.0000 | 14.8 |
|                                     |        | Wild fisheries → Real estate and business services → Public administration and defense                                 | 0.0000 | 1.1133 | 0.0000 | 14.8 |
|                                     |        | Wild fisheries → Seafood processing → Real estate and business services → Public administration and defense            | 0.0000 | 1.2253 | 0.0000 | 12.1 |
|                                     |        | Wild fisheries → Other manufacturing → Public administration and defense                                               | 0.0000 | 1.0975 | 0.0000 | 9.5  |
|                                     |        | Wild fisheries → Seafood processing → Food and beverage → Public administration and defense                            | 0.0000 | 1.3253 | 0.0000 | 8.8  |
|                                     |        | Wild fisheries → Food and beverage → Agriculture and forestry → Public administration and defense                      | 0.0000 | 1.2642 | 0.0000 | 5.1  |
|                                     |        | Wild fisheries → Food and beverage → Public administration and defense                                                 | 0.0000 | 1.2043 | 0.0000 | 3.0  |
|                                     |        | Wild fisheries → Other manufacturing → Transport equipment → Public administration and defense                         | 0.0000 | 1.5203 | 0.0000 | 2.2  |
|                                     |        | Wild fisheries → Social and other services → Public administration and defense                                         | 0.0000 | 1.0671 | 0.0000 | 2.0  |
| Educational and health services     | 0.0003 | Wild fisheries → Other manufacturing → Educational and health services                                                 | 0.0001 | 1.1202 | 0.0001 | 20.5 |
|                                     |        | Wild fisheries → Educational and health services                                                                       | 0.0000 | 1.0370 | 0.0000 | 12.9 |

|                           |          |                                                                                                                      |        |        |        |      |
|---------------------------|----------|----------------------------------------------------------------------------------------------------------------------|--------|--------|--------|------|
|                           |          | Wild fisheries → Seafood processing → Chemical products → Educational and health services                            | 0.0000 | 1.6947 | 0.0000 | 10.2 |
|                           |          | Wild fisheries → Seafood processing → Food and beverage → Agriculture and forestry → Educational and health services | 0.0000 | 1.4199 | 0.0000 | 8.4  |
|                           |          | Wild fisheries → Seafood processing → Food and beverage → Educational and health services                            | 0.0000 | 1.3526 | 0.0000 | 6.7  |
|                           |          | Wild fisheries → Real estate and business services → Educational and health services                                 | 0.0000 | 1.1359 | 0.0000 | 6.5  |
|                           |          | Wild fisheries → Seafood processing → Real estate and business services → Educational and health services            | 0.0000 | 1.2501 | 0.0000 | 5.4  |
|                           |          | Wild fisheries → Chemical products → Educational and health services                                                 | 0.0000 | 1.5398 | 0.0000 | 4.3  |
|                           |          | Wild fisheries → Seafood processing → Food and beverage → Chemical products → Educational and health services        | 0.0000 | 2.0080 | 0.0000 | 3.4  |
|                           |          | Wild fisheries → Food and beverage → Agriculture and forestry → Educational and health services                      | 0.0000 | 1.2902 | 0.0000 | 2.9  |
|                           |          | Wild fisheries → Other manufacturing → Office supplies → Educational and health services                             | 0.0000 | 1.1226 | 0.0000 | 2.3  |
|                           |          | Wild fisheries → Food and beverage → Educational and health services                                                 | 0.0000 | 1.2292 | 0.0000 | 2.3  |
| Social and other services | 0.0006   | Wild fisheries → Social and other services                                                                           | 0.0003 | 1.0669 | 0.0003 | 52.5 |
|                           |          | Wild fisheries → Seafood processing → Social and other services                                                      | 0.0001 | 1.1742 | 0.0001 | 15.1 |
|                           |          | Wild fisheries → Seafood processing → Food and beverage → Social and other services                                  | 0.0000 | 1.3917 | 0.0000 | 8.4  |
|                           |          | Wild fisheries → Other manufacturing → Social and other services                                                     | 0.0000 | 1.1525 | 0.0000 | 6.1  |
|                           |          | Wild fisheries → Real estate and business services → Social and other services                                       | 0.0000 | 1.1666 | 0.0000 | 4.0  |
|                           |          | Wild fisheries → Seafood processing → Real estate and business services → Social and other services                  | 0.0000 | 1.2840 | 0.0000 | 3.2  |
|                           |          | Wild fisheries → Food and beverage → Social and other services                                                       | 0.0000 | 1.2646 | 0.0000 | 2.9  |
| Office supplies           | 3.49E-05 | Wild fisheries → Other manufacturing → Office supplies                                                               | 0.0000 | 1.0998 | 0.0000 | 82.5 |
|                           |          | Wild fisheries → Seafood processing → Chemical products → Office supplies                                            | 0.0000 | 1.6649 | 0.0000 | 2.6  |

**Table B.5 Forward linkage SPA: Aquaculture**

| <b>Destination</b>       | <b>Global Influence</b> | <b>Elementary Paths</b>                                                                          | <b>Direct Influence</b> | <b>Path Multiplier</b> | <b>Total Influence</b> | <b>TG ratio (in %)</b> |
|--------------------------|-------------------------|--------------------------------------------------------------------------------------------------|-------------------------|------------------------|------------------------|------------------------|
| Wild fisheries           | 0.0000                  | Aquaculture → Seafood processing → Food and beverage → Wild fisheries                            | 0.0000                  | 1.4246                 | 0.0000                 | 50.2                   |
|                          |                         | Aquaculture → Food and beverage → Wild fisheries                                                 | 0.0000                  | 1.2946                 | 0.0000                 | 14.4                   |
|                          |                         | Aquaculture → Seafood processing → Food and beverage → Agriculture and forestry → Wild fisheries | 0.0000                  | 1.4955                 | 0.0000                 | 7.9                    |
|                          |                         | Aquaculture → Real estate and business services → Wild fisheries                                 | 0.0000                  | 1.1968                 | 0.0000                 | 4.4                    |
|                          |                         | Aquaculture → Chemical products → Wild fisheries                                                 | 0.0000                  | 1.6227                 | 0.0000                 | 2.8                    |
|                          |                         | Aquaculture → Food and beverage → Agriculture and forestry → Wild fisheries                      | 0.0000                  | 1.3589                 | 0.0000                 | 2.3                    |
|                          |                         | Aquaculture → Other manufacturing → Transport equipment → Wild fisheries                         | 0.0000                  | 1.6344                 | 0.0000                 | 2.1                    |
| Aquaculture              | 1.0752                  | Aquaculture → Aquaculture                                                                        | 0.0699                  | 1.1911                 | 0.0832                 | 7.7                    |
| Agriculture and forestry | 0.0019                  | Aquaculture → Seafood processing → Food and beverage → Agriculture and forestry                  | 0.0010                  | 1.4722                 | 0.0015                 | 75.9                   |
|                          |                         | Aquaculture → Food and beverage → Agriculture and forestry                                       | 0.0003                  | 1.3377                 | 0.0004                 | 21.8                   |
| Mineral products         | 0.0000                  | Aquaculture → Real estate and business services → Mineral products                               | 0.0000                  | 1.1787                 | 0.0000                 | 15.8                   |
|                          |                         | Aquaculture → Chemical products → Mineral products                                               | 0.0000                  | 1.5980                 | 0.0000                 | 12.7                   |
|                          |                         | Aquaculture → Other manufacturing → Transport equipment → Mineral products                       | 0.0000                  | 1.6096                 | 0.0000                 | 12.1                   |
|                          |                         | Aquaculture → Seafood processing → Chemical products → Mineral products                          | 0.0000                  | 1.7587                 | 0.0000                 | 5.1                    |
|                          |                         | Aquaculture → Real estate and business services → Transportation → Mineral products              | 0.0000                  | 1.2447                 | 0.0000                 | 4.0                    |
|                          |                         | Aquaculture → Social and other services → Mineral products                                       | 0.0000                  | 1.1298                 | 0.0000                 | 3.2                    |
|                          |                         | Aquaculture → Seafood processing → Real estate and business services → Mineral products          | 0.0000                  | 1.2972                 | 0.0000                 | 2.7                    |
|                          |                         | Aquaculture → Other manufacturing → Mineral products                                             | 0.0000                  | 1.1620                 | 0.0000                 | 2.2                    |
| Seafood processing       | 0.3562                  | Aquaculture → Seafood processing                                                                 | 0.3010                  | 1.1833                 | 0.3561                 | 100.0                  |
| Food and beverage        | 0.0212                  | Aquaculture → Seafood processing → Food and beverage                                             | 0.0117                  | 1.4024                 | 0.0164                 | 77.2                   |
|                          |                         | Aquaculture → Food and beverage                                                                  | 0.0037                  | 1.2744                 | 0.0047                 | 22.1                   |
| Textile and leather      | 0.0002                  | Aquaculture → Other manufacturing → Textile and leather                                          | 0.0000                  | 1.4910                 | 0.0001                 | 39.2                   |
|                          |                         | Aquaculture → Chemical products → Textile and leather                                            | 0.0000                  | 2.0506                 | 0.0000                 | 16.3                   |
|                          |                         | Aquaculture → Real estate and business services → Textile and leather                            | 0.0000                  | 1.5137                 | 0.0000                 | 11.1                   |
|                          |                         | Aquaculture → Seafood processing → Chemical products → Textile and leather                       | 0.0000                  | 2.2568                 | 0.0000                 | 6.5                    |
|                          |                         | Aquaculture → Seafood processing → Food and beverage → Textile and leather                       | 0.0000                  | 1.8021                 | 0.0000                 | 6.0                    |

|                      |        |                                                                                                  |        |        |        |      |
|----------------------|--------|--------------------------------------------------------------------------------------------------|--------|--------|--------|------|
|                      |        | Aquaculture → Seafood processing → Food and beverage → Chemical products → Textile and leather   | 0.0000 | 2.6740 | 0.0000 | 2.2  |
| Wood and paper       | 0.0001 | Aquaculture → Chemical products → Wood and paper                                                 | 0.0000 | 2.0873 | 0.0000 | 17.9 |
|                      |        | Aquaculture → Seafood processing → Food and beverage → Wood and paper                            | 0.0000 | 1.8342 | 0.0000 | 12.8 |
|                      |        | Aquaculture → Real estate and business services → Wood and paper                                 | 0.0000 | 1.5406 | 0.0000 | 11.5 |
|                      |        | Aquaculture → Seafood processing → Food and beverage → Agriculture and forestry → Wood and paper | 0.0000 | 1.9253 | 0.0000 | 11.2 |
|                      |        | Aquaculture → Seafood processing → Chemical products → Wood and paper                            | 0.0000 | 2.2972 | 0.0000 | 7.2  |
|                      |        | Aquaculture → Food and beverage → Wood and paper                                                 | 0.0000 | 1.6667 | 0.0000 | 3.7  |
|                      |        | Aquaculture → Other manufacturing → Wood and paper                                               | 0.0000 | 1.5190 | 0.0000 | 3.7  |
|                      |        | Aquaculture → Food and beverage → Agriculture and forestry → Wood and paper                      | 0.0000 | 1.7495 | 0.0000 | 3.2  |
|                      |        | Aquaculture → Real estate and business services → Wholesale and retail → Wood and paper          | 0.0000 | 1.5819 | 0.0000 | 2.7  |
|                      |        | Aquaculture → Seafood processing → Food and beverage → Chemical products → Wood and paper        | 0.0000 | 2.7217 | 0.0000 | 2.4  |
| Printing and copying | 0.0000 | Aquaculture → Real estate and business services → Printing and copying                           | 0.0000 | 1.3320 | 0.0000 | 18.2 |
|                      |        | Aquaculture → Social and other services → Printing and copying                                   | 0.0000 | 1.2766 | 0.0000 | 16.5 |
|                      |        | Aquaculture → Chemical products → Printing and copying                                           | 0.0000 | 1.8064 | 0.0000 | 15.0 |
|                      |        | Aquaculture → Seafood processing → Chemical products → Printing and copying                      | 0.0000 | 1.9880 | 0.0000 | 6.0  |
|                      |        | Aquaculture → Other manufacturing → Office supplies → Printing and copying                       | 0.0000 | 1.3159 | 0.0000 | 3.2  |
|                      |        | Aquaculture → Seafood processing → Real estate and business services → Printing and copying      | 0.0000 | 1.4660 | 0.0000 | 3.1  |
|                      |        | Aquaculture → Chemical products → Wood and paper → Printing and copying                          | 0.0000 | 2.3580 | 0.0000 | 2.6  |
|                      |        | Aquaculture → Real estate and business services → Wholesale and retail → Printing and copying    | 0.0000 | 1.3687 | 0.0000 | 2.0  |
| Coal and petroleum   | 0.0001 | Aquaculture → Real estate and business services → Coal and petroleum                             | 0.0000 | 1.2360 | 0.0000 | 29.1 |
|                      |        | Aquaculture → Chemical products → Coal and petroleum                                             | 0.0000 | 1.6691 | 0.0000 | 21.4 |
|                      |        | Aquaculture → Seafood processing → Chemical products → Coal and petroleum                        | 0.0000 | 1.8369 | 0.0000 | 8.5  |
|                      |        | Aquaculture → Seafood processing → Real estate and business services → Coal and petroleum        | 0.0000 | 1.3603 | 0.0000 | 5.0  |
|                      |        | Aquaculture → Social and other services → Coal and petroleum                                     | 0.0000 | 1.1850 | 0.0000 | 3.2  |
|                      |        | Aquaculture → Seafood processing → Food and beverage → Chemical products → Coal and petroleum    | 0.0000 | 2.1765 | 0.0000 | 2.8  |
| Chemical products    | 0.0020 | Aquaculture → Chemical products                                                                  | 0.0007 | 1.5973 | 0.0011 | 56.3 |
|                      |        | Aquaculture → Seafood processing → Chemical products                                             | 0.0003 | 1.7580 | 0.0004 | 22.5 |

|                               |        |                                                                                                        |        |        |        |      |
|-------------------------------|--------|--------------------------------------------------------------------------------------------------------|--------|--------|--------|------|
|                               |        | Aquaculture → Seafood processing → Food and beverage → Chemical products                               | 0.0001 | 2.0830 | 0.0001 | 7.5  |
|                               |        | Aquaculture → Real estate and business services → Chemical products                                    | 0.0001 | 1.7488 | 0.0001 | 4.9  |
|                               |        | Aquaculture → Food and beverage → Chemical products                                                    | 0.0000 | 1.8928 | 0.0000 | 2.1  |
| Non-metallic mineral products | 0.0000 | Aquaculture → Real estate and business services → Non-metallic mineral products                        | 0.0000 | 1.3021 | 0.0000 | 23.3 |
|                               |        | Aquaculture → Chemical products → Non-metallic mineral products                                        | 0.0000 | 1.7653 | 0.0000 | 11.5 |
|                               |        | Aquaculture → Seafood processing → Chemical products → Non-metallic mineral products                   | 0.0000 | 1.9428 | 0.0000 | 4.6  |
|                               |        | Aquaculture → Seafood processing → Real estate and business services → Non-metallic mineral products   | 0.0000 | 1.4331 | 0.0000 | 4.0  |
|                               |        | Aquaculture → Seafood processing → Food and beverage → Non-metallic mineral products                   | 0.0000 | 1.5503 | 0.0000 | 3.2  |
|                               |        | Aquaculture → Real estate and business services → Wholesale and retail → Non-metallic mineral products | 0.0000 | 1.3382 | 0.0000 | 3.0  |
|                               |        | Aquaculture → Real estate and business services → Transportation → Non-metallic mineral products       | 0.0000 | 1.3749 | 0.0000 | 2.9  |
|                               |        | Aquaculture → Social and other services → Non-metallic mineral products                                | 0.0000 | 1.2483 | 0.0000 | 2.7  |
|                               |        | Aquaculture → Other manufacturing → Transport equipment → Non-metallic mineral products                | 0.0000 | 1.7782 | 0.0000 | 2.2  |
| Primary metal products        | 0.0002 | Aquaculture → Real estate and business services → Primary metal products                               | 0.0000 | 2.2370 | 0.0001 | 35.8 |
|                               |        | Aquaculture → Chemical products → Primary metal products                                               | 0.0000 | 3.0331 | 0.0000 | 8.6  |
|                               |        | Aquaculture → Seafood processing → Real estate and business services → Primary metal products          | 0.0000 | 2.4620 | 0.0000 | 6.2  |
|                               |        | Aquaculture → Real estate and business services → Wholesale and retail → Primary metal products        | 0.0000 | 2.2989 | 0.0000 | 4.4  |
|                               |        | Aquaculture → Seafood processing → Chemical products → Primary metal products                          | 0.0000 | 3.3381 | 0.0000 | 3.4  |
|                               |        | Aquaculture → Social and other services → Primary metal products                                       | 0.0000 | 2.1447 | 0.0000 | 2.4  |
| Metal products                | 0.0001 | Aquaculture → Real estate and business services → Metal products                                       | 0.0000 | 1.3580 | 0.0000 | 18.4 |
|                               |        | Aquaculture → Chemical products → Metal products                                                       | 0.0000 | 1.8403 | 0.0000 | 17.4 |
|                               |        | Aquaculture → Real estate and business services → Primary metal products → Metal products              | 0.0000 | 2.5704 | 0.0000 | 7.6  |
|                               |        | Aquaculture → Seafood processing → Chemical products → Metal products                                  | 0.0000 | 2.0254 | 0.0000 | 7.0  |
|                               |        | Aquaculture → Seafood processing → Real estate and business services → Metal products                  | 0.0000 | 1.4946 | 0.0000 | 3.2  |
|                               |        | Aquaculture → Real estate and business services → Wholesale and retail → Metal products                | 0.0000 | 1.3955 | 0.0000 | 3.0  |
|                               |        | Aquaculture → Seafood processing → Food and beverage → Chemical products → Metal products              | 0.0000 | 2.3998 | 0.0000 | 2.3  |
|                               |        | Aquaculture → Other manufacturing → Office supplies → Metal products                                   | 0.0000 | 1.3419 | 0.0000 | 2.0  |
| General machinery             | 0.0002 | Aquaculture → Real estate and business services → General machinery                                    | 0.0000 | 1.4410 | 0.0001 | 28.3 |

|                                   |        |                                                                                                             |        |        |        |      |
|-----------------------------------|--------|-------------------------------------------------------------------------------------------------------------|--------|--------|--------|------|
|                                   |        | Aquaculture → Chemical products → General machinery                                                         | 0.0000 | 1.9530 | 0.0000 | 10.2 |
|                                   |        | Aquaculture → Seafood processing → Real estate and business services → General machinery                    | 0.0000 | 1.5859 | 0.0000 | 4.9  |
|                                   |        | Aquaculture → Seafood processing → Chemical products → General machinery                                    | 0.0000 | 2.1494 | 0.0000 | 4.1  |
|                                   |        | Aquaculture → Other manufacturing → General machinery                                                       | 0.0000 | 1.4210 | 0.0000 | 3.6  |
|                                   |        | Aquaculture → Real estate and business services → Electric and electronic equipment → General machinery     | 0.0000 | 1.9359 | 0.0000 | 3.1  |
|                                   |        | Aquaculture → Real estate and business services → Wholesale and retail → General machinery                  | 0.0000 | 1.4807 | 0.0000 | 3.1  |
|                                   |        | Aquaculture → Real estate and business services → Primary metal products → General machinery                | 0.0000 | 2.7306 | 0.0000 | 3.1  |
|                                   |        | Aquaculture → Other manufacturing → Transport equipment → General machinery                                 | 0.0000 | 1.9672 | 0.0000 | 2.1  |
| Electric and electronic equipment | 0.0005 | Aquaculture → Real estate and business services → Electric and electronic equipment                         | 0.0001 | 1.5850 | 0.0002 | 43.8 |
|                                   |        | Aquaculture → Chemical products → Electric and electronic equipment                                         | 0.0000 | 2.1521 | 0.0001 | 13.5 |
|                                   |        | Aquaculture → Seafood processing → Real estate and business services → Electric and electronic equipment    | 0.0000 | 1.7444 | 0.0000 | 7.5  |
|                                   |        | Aquaculture → Seafood processing → Chemical products → Electric and electronic equipment                    | 0.0000 | 2.3685 | 0.0000 | 5.4  |
|                                   |        | Aquaculture → Real estate and business services → Wholesale and retail → Electric and electronic equipment  | 0.0000 | 1.6284 | 0.0000 | 2.5  |
| Precision instruments             | 0.0000 | Aquaculture → Real estate and business services → Precision instruments                                     | 0.0000 | 1.2351 | 0.0000 | 36.3 |
|                                   |        | Aquaculture → Chemical products → Precision instruments                                                     | 0.0000 | 1.6748 | 0.0000 | 15.4 |
|                                   |        | Aquaculture → Seafood processing → Real estate and business services → Precision instruments                | 0.0000 | 1.3593 | 0.0000 | 6.2  |
|                                   |        | Aquaculture → Seafood processing → Chemical products → Precision instruments                                | 0.0000 | 1.8433 | 0.0000 | 6.2  |
|                                   |        | Aquaculture → Other manufacturing → Precision instruments                                                   | 0.0000 | 1.2179 | 0.0000 | 4.2  |
|                                   |        | Aquaculture → Real estate and business services → Electric and electronic equipment → Precision instruments | 0.0000 | 1.6600 | 0.0000 | 3.7  |
|                                   |        | Aquaculture → Real estate and business services → Wholesale and retail → Precision instruments              | 0.0000 | 1.2693 | 0.0000 | 2.2  |
|                                   |        | Aquaculture → Seafood processing → Food and beverage → Chemical products → Precision instruments            | 0.0000 | 2.1840 | 0.0000 | 2.0  |
| Transport equipment               | 0.0012 | Aquaculture → Other manufacturing → Transport equipment                                                     | 0.0005 | 1.6089 | 0.0008 | 68.3 |
|                                   |        | Aquaculture → Chemical products → Transport equipment                                                       | 0.0000 | 2.2120 | 0.0001 | 7.4  |
|                                   |        | Aquaculture → Real estate and business services → Transport equipment                                       | 0.0001 | 1.6317 | 0.0001 | 7.1  |
|                                   |        | Aquaculture → Seafood processing → Chemical products → Transport equipment                                  | 0.0000 | 2.4344 | 0.0000 | 2.9  |
| Other manufacturing               | 0.0027 | Aquaculture → Other manufacturing                                                                           | 0.0023 | 1.1614 | 0.0027 | 98.7 |

|                                     |        |                                                                                                              |        |        |        |      |
|-------------------------------------|--------|--------------------------------------------------------------------------------------------------------------|--------|--------|--------|------|
| Electricity, gas, and water         | 0.0000 | Aquaculture → Real estate and business services → Electricity, gas, and water                                | 0.0000 | 1.4205 | 0.0000 | 46.1 |
|                                     |        | Aquaculture → Chemical products → Electricity, gas, and water                                                | 0.0000 | 1.9267 | 0.0000 | 11.3 |
|                                     |        | Aquaculture → Seafood processing → Real estate and business services → Electricity, gas, and water           | 0.0000 | 1.5634 | 0.0000 | 7.9  |
|                                     |        | Aquaculture → Seafood processing → Chemical products → Electricity, gas, and water                           | 0.0000 | 2.1205 | 0.0000 | 4.5  |
| Construction                        | 0.0005 | Aquaculture → Other manufacturing → Construction                                                             | 0.0001 | 1.1652 | 0.0002 | 34.5 |
|                                     |        | Aquaculture → Real estate and business services → Construction                                               | 0.0001 | 1.1790 | 0.0001 | 20.8 |
|                                     |        | Aquaculture → Chemical products → Construction                                                               | 0.0000 | 1.6024 | 0.0000 | 5.6  |
|                                     |        | Aquaculture → Seafood processing → Real estate and business services → Construction                          | 0.0000 | 1.2976 | 0.0000 | 3.6  |
|                                     |        | Aquaculture → Seafood processing → Food and beverage → Agriculture and forestry → Construction               | 0.0000 | 1.4770 | 0.0000 | 2.3  |
|                                     |        | Aquaculture → Seafood processing → Chemical products → Construction                                          | 0.0000 | 1.7635 | 0.0000 | 2.2  |
| Wholesale and retail                | 0.0003 | Aquaculture → Real estate and business services → Wholesale and retail                                       | 0.0001 | 1.2109 | 0.0002 | 48.6 |
|                                     |        | Aquaculture → Other manufacturing → Wholesale and retail                                                     | 0.0000 | 1.1960 | 0.0000 | 11.5 |
|                                     |        | Aquaculture → Seafood processing → Real estate and business services → Wholesale and retail                  | 0.0000 | 1.3326 | 0.0000 | 8.4  |
|                                     |        | Aquaculture → Real estate and business services → Telecommunications and broadcasting → Wholesale and retail | 0.0000 | 1.3818 | 0.0000 | 3.3  |
|                                     |        | Aquaculture → Social and other services → Wholesale and retail                                               | 0.0000 | 1.1627 | 0.0000 | 2.5  |
| Food service                        | 0.4716 | Aquaculture → Food service                                                                                   | 0.3557 | 1.0752 | 0.3824 | 81.1 |
|                                     |        | Aquaculture → Seafood processing → Food service                                                              | 0.0710 | 1.1833 | 0.0840 | 17.8 |
| Transportation                      | 0.0001 | Aquaculture → Real estate and business services → Transportation                                             | 0.0000 | 1.2441 | 0.0000 | 31.7 |
|                                     |        | Aquaculture → Other manufacturing → Transport equipment → Transportation                                     | 0.0000 | 1.6980 | 0.0000 | 14.8 |
|                                     |        | Aquaculture → Social and other services → Transportation                                                     | 0.0000 | 1.1934 | 0.0000 | 6.7  |
|                                     |        | Aquaculture → Seafood processing → Real estate and business services → Transportation                        | 0.0000 | 1.3693 | 0.0000 | 5.4  |
|                                     |        | Aquaculture → Other manufacturing → Transportation                                                           | 0.0000 | 1.2276 | 0.0000 | 4.0  |
|                                     |        | Aquaculture → Chemical products → Transportation                                                             | 0.0000 | 1.6871 | 0.0000 | 3.2  |
|                                     |        | Aquaculture → Real estate and business services → Finance and insurance → Transportation                     | 0.0000 | 1.6251 | 0.0000 | 2.4  |
|                                     |        | Aquaculture → Real estate and business services → Coal and petroleum → Transportation                        | 0.0000 | 1.3010 | 0.0000 | 2.3  |
| Telecommunications and broadcasting | 0.0002 | Aquaculture → Real estate and business services → Telecommunications and broadcasting                        | 0.0001 | 1.3529 | 0.0001 | 44.5 |
|                                     |        | Aquaculture → Social and other services → Telecommunications and broadcasting                                | 0.0000 | 1.3030 | 0.0000 | 12.8 |



|                                   |          |                                                                                                                     |        |        |        |      |
|-----------------------------------|----------|---------------------------------------------------------------------------------------------------------------------|--------|--------|--------|------|
|                                   |          | Aquaculture → Other manufacturing → Telecommunications and broadcasting                                             | 0.0000 | 1.3412 | 0.0000 | 11.8 |
|                                   |          | Aquaculture → Seafood processing → Real estate and business services → Telecommunications and broadcasting          | 0.0000 | 1.4889 | 0.0000 | 7.6  |
|                                   |          | Aquaculture → Real estate and business services → Wholesale and retail → Telecommunications and broadcasting        | 0.0000 | 1.3818 | 0.0000 | 3.7  |
| Finance and insurance             | 0.0002   | Aquaculture → Real estate and business services → Finance and insurance                                             | 0.0001 | 1.5398 | 0.0001 | 58.6 |
|                                   |          | Aquaculture → Seafood processing → Real estate and business services → Finance and insurance                        | 0.0000 | 1.6947 | 0.0000 | 10.1 |
|                                   |          | Aquaculture → Other manufacturing → Finance and insurance                                                           | 0.0000 | 1.5283 | 0.0000 | 9.2  |
|                                   |          | Aquaculture → Social and other services → Finance and insurance                                                     | 0.0000 | 1.4856 | 0.0000 | 3.1  |
|                                   |          | Aquaculture → Real estate and business services → Telecommunications and broadcasting → Finance and insurance       | 0.0000 | 1.7666 | 0.0000 | 2.7  |
| Real estate and business services | 0.0031   | Aquaculture → Real estate and business services                                                                     | 0.0021 | 1.1781 | 0.0025 | 79.7 |
|                                   |          | Aquaculture → Seafood processing → Real estate and business services                                                | 0.0003 | 1.2966 | 0.0004 | 13.7 |
| Public administration and defense | 0.000119 | Aquaculture → Real estate and business services → Public administration and defense                                 | 0.0000 | 1.1783 | 0.0000 | 29.9 |
|                                   |          | Aquaculture → Other manufacturing → Public administration and defense                                               | 0.0000 | 1.1616 | 0.0000 | 13.8 |
|                                   |          | Aquaculture → Seafood processing → Food and beverage → Agriculture and forestry → Public administration and defense | 0.0000 | 1.4724 | 0.0000 | 6.3  |
|                                   |          | Aquaculture → Seafood processing → Real estate and business services → Public administration and defense            | 0.0000 | 1.2968 | 0.0000 | 5.1  |
|                                   |          | Aquaculture → Social and other services → Public administration and defense                                         | 0.0000 | 1.1294 | 0.0000 | 4.0  |
|                                   |          | Aquaculture → Seafood processing → Food and beverage → Public administration and defense                            | 0.0000 | 1.4026 | 0.0000 | 3.7  |
|                                   |          | Aquaculture → Other manufacturing → Transport equipment → Public administration and defense                         | 0.0000 | 1.6091 | 0.0000 | 3.2  |
|                                   |          | Aquaculture → Other manufacturing → Office supplies → Public administration and defense                             | 0.0000 | 1.1642 | 0.0000 | 2.5  |
| Educational and health services   | 0.0004   | Aquaculture → Other manufacturing → Educational and health services                                                 | 0.0001 | 1.1855 | 0.0001 | 33.2 |
|                                   |          | Aquaculture → Real estate and business services → Educational and health services                                   | 0.0001 | 1.2022 | 0.0001 | 14.8 |
|                                   |          | Aquaculture → Chemical products → Educational and health services                                                   | 0.0000 | 1.6297 | 0.0001 | 12.1 |
|                                   |          | Aquaculture → Seafood processing → Chemical products → Educational and health services                              | 0.0000 | 1.7937 | 0.0000 | 4.8  |
|                                   |          | Aquaculture → Seafood processing → Food and beverage → Agriculture and forestry → Educational and health services   | 0.0000 | 1.5027 | 0.0000 | 4.0  |
|                                   |          | Aquaculture → Other manufacturing → Office supplies → Educational and health services                               | 0.0000 | 1.1882 | 0.0000 | 3.8  |
|                                   |          | Aquaculture → Seafood processing → Food and beverage → Educational and health services                              | 0.0000 | 1.4316 | 0.0000 | 3.2  |

|                           |          |                                                                                                        |        |        |        |      |
|---------------------------|----------|--------------------------------------------------------------------------------------------------------|--------|--------|--------|------|
|                           |          | Aquaculture → Social and other services → Educational and health services                              | 0.0000 | 1.1526 | 0.0000 | 3.1  |
|                           |          | Aquaculture → Seafood processing → Real estate and business services → Educational and health services | 0.0000 | 1.3231 | 0.0000 | 2.5  |
| Social and other services | 0.0013   | Aquaculture → Social and other services                                                                | 0.0009 | 1.1292 | 0.0010 | 73.6 |
|                           |          | Aquaculture → Other manufacturing → Social and other services                                          | 0.0001 | 1.2197 | 0.0001 | 6.2  |
|                           |          | Aquaculture → Real estate and business services → Social and other services                            | 0.0001 | 1.2348 | 0.0001 | 5.7  |
|                           |          | Aquaculture → Seafood processing → Social and other services                                           | 0.0000 | 1.2428 | 0.0001 | 4.5  |
|                           |          | Aquaculture → Seafood processing → Food and beverage → Social and other services                       | 0.0000 | 1.4729 | 0.0000 | 2.5  |
| Office supplies           | 7.81E-05 | Aquaculture → Other manufacturing → Office supplies                                                    | 0.0001 | 1.1640 | 0.0001 | 88.1 |
|                           |          | Aquaculture → Chemical products → Office supplies                                                      | 0.0000 | 1.6011 | 0.0000 | 2.1  |

**Table B.6 Forward linkage SPA: Seafood processing**

| <b>Destination</b>       | <b>Global Influence</b> | <b>Elementary Paths</b>                                                                    | <b>Direct Influence</b> | <b>Path Multiplier</b> | <b>Total Influence</b> | <b>TG ratio (in %)</b> |
|--------------------------|-------------------------|--------------------------------------------------------------------------------------------|-------------------------|------------------------|------------------------|------------------------|
| Wild fisheries           | 0.0001                  | Seafood processing → Food and beverage → Wild fisheries                                    | 0.0000                  | 1.3251                 | 0.0000                 | 79.9                   |
|                          |                         | Seafood processing → Food and beverage → Agriculture and forestry → Wild fisheries         | 0.0000                  | 1.3910                 | 0.0000                 | 12.6                   |
| Aquaculture              | 0.0001                  | Seafood processing → Food and beverage → Aquaculture                                       | 0.0001                  | 1.4024                 | 0.0001                 | 92.2                   |
|                          |                         | Seafood processing → Food and beverage → Agriculture and forestry → Aquaculture            | 0.0000                  | 1.4722                 | 0.0000                 | 6.6                    |
| Agriculture and forestry | 0.0046                  | Seafood processing → Food and beverage → Agriculture and forestry                          | 0.0033                  | 1.3693                 | 0.0045                 | 99.3                   |
| Mineral products         | 0.0000                  | Seafood processing → Chemical products → Mineral products                                  | 0.0000                  | 1.6358                 | 0.0000                 | 27.4                   |
|                          |                         | Seafood processing → Real estate and business services → Mineral products                  | 0.0000                  | 1.2066                 | 0.0000                 | 14.7                   |
|                          |                         | Seafood processing → Food and beverage → Agriculture and forestry → Mineral products       | 0.0000                  | 1.3700                 | 0.0000                 | 9.6                    |
|                          |                         | Seafood processing → Food and beverage → Chemical products → Mineral products              | 0.0000                  | 1.9382                 | 0.0000                 | 9.1                    |
|                          |                         | Seafood processing → Real estate and business services → Transportation → Mineral products | 0.0000                  | 1.2741                 | 0.0000                 | 3.7                    |
|                          |                         | Seafood processing → Chemical products → Transport equipment → Mineral products            | 0.0000                  | 2.2652                 | 0.0000                 | 2.8                    |
| Seafood processing       | 1.1006                  | Seafood processing → Seafood processing                                                    | 0.0913                  | 1.3044                 | 0.1191                 | 10.8                   |
| Food and beverage        | 0.0507                  | Seafood processing → Food and beverage                                                     | 0.0388                  | 1.3044                 | 0.0506                 | 99.9                   |
| Textile and leather      | 0.0001                  | Seafood processing → Chemical products → Textile and leather                               | 0.0000                  | 2.0991                 | 0.0000                 | 34.2                   |
|                          |                         | Seafood processing → Food and beverage → Textile and leather                               | 0.0000                  | 1.6762                 | 0.0000                 | 31.4                   |
|                          |                         | Seafood processing → Food and beverage → Chemical products → Textile and leather           | 0.0000                  | 2.4872                 | 0.0000                 | 11.4                   |
|                          |                         | Seafood processing → Real estate and business services → Textile and leather               | 0.0000                  | 1.5495                 | 0.0000                 | 10.0                   |
| Wood and paper           | 0.0001                  | Seafood processing → Food and beverage → Wood and paper                                    | 0.0000                  | 1.7060                 | 0.0000                 | 32.9                   |
|                          |                         | Seafood processing → Food and beverage → Agriculture and forestry → Wood and paper         | 0.0000                  | 1.7907                 | 0.0000                 | 28.8                   |
|                          |                         | Seafood processing → Chemical products → Wood and paper                                    | 0.0000                  | 2.1366                 | 0.0000                 | 18.4                   |
|                          |                         | Seafood processing → Food and beverage → Chemical products → Wood and paper                | 0.0000                  | 2.5315                 | 0.0000                 | 6.1                    |
|                          |                         | Seafood processing → Real estate and business services → Wood and paper                    | 0.0000                  | 1.5770                 | 0.0000                 | 5.1                    |
| Printing and copying     | 0.0000                  | Seafood processing → Chemical products → Printing and copying                              | 0.0000                  | 1.8491                 | 0.0000                 | 28.5                   |
|                          |                         | Seafood processing → Real estate and business services → Printing and copying              | 0.0000                  | 1.3635                 | 0.0000                 | 14.8                   |
|                          |                         | Seafood processing → Food and beverage → Chemical products → Printing and copying          | 0.0000                  | 2.1910                 | 0.0000                 | 9.5                    |
|                          |                         | Seafood processing → Food and beverage → Wood and paper → Printing and copying             | 0.0000                  | 1.9278                 | 0.0000                 | 8.7                    |

|                               |        |                                                                                                               |        |        |        |      |
|-------------------------------|--------|---------------------------------------------------------------------------------------------------------------|--------|--------|--------|------|
|                               |        | Seafood processing → Food and beverage → Agriculture and forestry → Wood and paper → Printing and copying     | 0.0000 | 2.0236 | 0.0000 | 7.6  |
|                               |        | Seafood processing → Chemical products → Wood and paper → Printing and copying                                | 0.0000 | 2.4137 | 0.0000 | 4.9  |
|                               |        | Seafood processing → Social and other services → Printing and copying                                         | 0.0000 | 1.3068 | 0.0000 | 4.8  |
|                               |        | Seafood processing → Food and beverage → Social and other services → Printing and copying                     | 0.0000 | 1.5487 | 0.0000 | 2.7  |
| Coal and petroleum            | 0.0001 | Seafood processing → Chemical products → Coal and petroleum                                                   | 0.0000 | 1.7086 | 0.0000 | 39.3 |
|                               |        | Seafood processing → Real estate and business services → Coal and petroleum                                   | 0.0000 | 1.2652 | 0.0000 | 23.0 |
|                               |        | Seafood processing → Food and beverage → Chemical products → Coal and petroleum                               | 0.0000 | 2.0245 | 0.0000 | 13.1 |
|                               |        | Seafood processing → Food and beverage → Coal and petroleum                                                   | 0.0000 | 1.3690 | 0.0000 | 3.9  |
| Chemical products             | 0.0020 | Seafood processing → Chemical products                                                                        | 0.0008 | 1.6351 | 0.0014 | 69.7 |
|                               |        | Seafood processing → Food and beverage → Chemical products                                                    | 0.0002 | 1.9374 | 0.0005 | 23.2 |
|                               |        | Seafood processing → Food and beverage → Agriculture and forestry → Chemical products                         | 0.0000 | 2.0334 | 0.0001 | 2.7  |
|                               |        | Seafood processing → Real estate and business services → Chemical products                                    | 0.0000 | 1.7901 | 0.0001 | 2.6  |
| Non-metallic mineral products | 0.0000 | Seafood processing → Chemical products → Non-metallic mineral products                                        | 0.0000 | 1.8070 | 0.0000 | 21.8 |
|                               |        | Seafood processing → Real estate and business services → Non-metallic mineral products                        | 0.0000 | 1.3329 | 0.0000 | 19.0 |
|                               |        | Seafood processing → Food and beverage → Non-metallic mineral products                                        | 0.0000 | 1.4420 | 0.0000 | 15.2 |
|                               |        | Seafood processing → Food and beverage → Chemical products → Non-metallic mineral products                    | 0.0000 | 2.1411 | 0.0000 | 7.2  |
|                               |        | Seafood processing → Real estate and business services → Wholesale and retail → Non-metallic mineral products | 0.0000 | 1.3699 | 0.0000 | 2.4  |
|                               |        | Seafood processing → Real estate and business services → Transportation → Non-metallic mineral products       | 0.0000 | 1.4075 | 0.0000 | 2.3  |
| Primary metal products        | 0.0001 | Seafood processing → Real estate and business services → Primary metal products                               | 0.0000 | 2.2899 | 0.0000 | 34.9 |
|                               |        | Seafood processing → Chemical products → Primary metal products                                               | 0.0000 | 3.1048 | 0.0000 | 19.6 |
|                               |        | Seafood processing → Food and beverage → Chemical products → Primary metal products                           | 0.0000 | 3.6789 | 0.0000 | 6.5  |
|                               |        | Seafood processing → Real estate and business services → Wholesale and retail → Primary metal products        | 0.0000 | 2.3532 | 0.0000 | 4.3  |
| Metal products                | 0.0001 | Seafood processing → Chemical products → Metal products                                                       | 0.0000 | 1.8838 | 0.0000 | 33.8 |
|                               |        | Seafood processing → Real estate and business services → Metal products                                       | 0.0000 | 1.3901 | 0.0000 | 15.3 |
|                               |        | Seafood processing → Food and beverage → Chemical products → Metal products                                   | 0.0000 | 2.2321 | 0.0000 | 11.2 |
|                               |        | Seafood processing → Real estate and business services → Primary metal products → Metal products              | 0.0000 | 2.6312 | 0.0000 | 6.3  |
|                               |        | Seafood processing → Chemical products → Primary metal products → Metal products                              | 0.0000 | 3.5658 | 0.0000 | 3.5  |

|                                   |          |                                                                                                                    |        |        |        |      |
|-----------------------------------|----------|--------------------------------------------------------------------------------------------------------------------|--------|--------|--------|------|
|                                   |          | Seafood processing → Real estate and business services → Wholesale and retail → Metal products                     | 0.0000 | 1.4285 | 0.0000 | 2.5  |
| General machinery                 | 0.0001   | Seafood processing → Real estate and business services → General machinery                                         | 0.0000 | 1.4750 | 0.0000 | 27.1 |
|                                   |          | Seafood processing → Chemical products → General machinery                                                         | 0.0000 | 1.9992 | 0.0000 | 22.7 |
|                                   |          | Seafood processing → Food and beverage → Chemical products → General machinery                                     | 0.0000 | 2.3688 | 0.0000 | 7.5  |
|                                   |          | Seafood processing → Real estate and business services → Electric and electronic equipment → General machinery     | 0.0000 | 1.9817 | 0.0000 | 3.0  |
|                                   |          | Seafood processing → Real estate and business services → Wholesale and retail → General machinery                  | 0.0000 | 1.5157 | 0.0000 | 3.0  |
|                                   |          | Seafood processing → Real estate and business services → Primary metal products → General machinery                | 0.0000 | 2.7952 | 0.0000 | 2.9  |
|                                   |          | Seafood processing → Chemical products → Metal products → General machinery                                        | 0.0000 | 2.2983 | 0.0000 | 2.4  |
|                                   |          | Seafood processing → Chemical products → Electric and electronic equipment → General machinery                     | 0.0000 | 2.6897 | 0.0000 | 2.2  |
| Electric and electronic equipment | 0.0003   | Seafood processing → Real estate and business services → Electric and electronic equipment                         | 0.0001 | 1.6225 | 0.0001 | 39.4 |
|                                   |          | Seafood processing → Chemical products → Electric and electronic equipment                                         | 0.0000 | 2.2030 | 0.0001 | 28.4 |
|                                   |          | Seafood processing → Food and beverage → Chemical products → Electric and electronic equipment                     | 0.0000 | 2.6103 | 0.0000 | 9.4  |
|                                   |          | Seafood processing → Real estate and business services → Wholesale and retail → Electric and electronic equipment  | 0.0000 | 1.6669 | 0.0000 | 2.3  |
| Precision instruments             | 2.75E-05 | Seafood processing → Real estate and business services → Precision instruments                                     | 0.0000 | 1.2643 | 0.0000 | 32.2 |
|                                   |          | Seafood processing → Chemical products → Precision instruments                                                     | 0.0000 | 1.7145 | 0.0000 | 31.8 |
|                                   |          | Seafood processing → Food and beverage → Chemical products → Precision instruments                                 | 0.0000 | 2.0314 | 0.0000 | 10.6 |
|                                   |          | Seafood processing → Real estate and business services → Electric and electronic equipment → Precision instruments | 0.0000 | 1.6992 | 0.0000 | 3.2  |
|                                   |          | Seafood processing → Chemical products → Electric and electronic equipment → Precision instruments                 | 0.0000 | 2.3075 | 0.0000 | 2.3  |
| Transport equipment               | 0.0003   | Seafood processing → Chemical products → Transport equipment                                                       | 0.0000 | 2.2643 | 0.0001 | 40.3 |
|                                   |          | Seafood processing → Real estate and business services → Transport equipment                                       | 0.0000 | 1.6703 | 0.0000 | 16.8 |
|                                   |          | Seafood processing → Food and beverage → Chemical products → Transport equipment                                   | 0.0000 | 2.6829 | 0.0000 | 13.4 |
|                                   |          | Seafood processing → Real estate and business services → Wholesale and retail → Transport equipment                | 0.0000 | 1.7159 | 0.0000 | 2.1  |
| Other manufacturing               | 0.0000   | Seafood processing → Chemical products → Other manufacturing                                                       | 0.0000 | 1.7661 | 0.0000 | 35.7 |
|                                   |          | Seafood processing → Food and beverage → Chemical products → Other manufacturing                                   | 0.0000 | 2.0926 | 0.0000 | 11.9 |
|                                   |          | Seafood processing → Real estate and business services → Other manufacturing                                       | 0.0000 | 1.3025 | 0.0000 | 7.6  |
|                                   |          | Seafood processing → Chemical products → Textile and leather → Other manufacturing                                 | 0.0000 | 2.2649 | 0.0000 | 4.0  |

|                             |          |                                                                                                                     |        |        |        |      |
|-----------------------------|----------|---------------------------------------------------------------------------------------------------------------------|--------|--------|--------|------|
|                             |          | Seafood processing → Food and beverage → Agriculture and forestry → Other manufacturing                             | 0.0000 | 1.4791 | 0.0000 | 4.0  |
|                             |          | Seafood processing → Food and beverage → Textile and leather → Other manufacturing                                  | 0.0000 | 1.8088 | 0.0000 | 3.7  |
|                             |          | Seafood processing → Food and beverage → Wood and paper → Other manufacturing                                       | 0.0000 | 1.8427 | 0.0000 | 3.0  |
|                             |          | Seafood processing → Food and beverage → Agriculture and forestry → Wood and paper → Other manufacturing            | 0.0000 | 1.9342 | 0.0000 | 2.6  |
|                             |          | Seafood processing → Food and beverage → Other manufacturing                                                        | 0.0000 | 1.4091 | 0.0000 | 2.1  |
| Electricity, gas, and water | 0.0000   | Seafood processing → Real estate and business services → Electricity, gas, and water                                | 0.0000 | 1.4541 | 0.0000 | 43.2 |
|                             |          | Seafood processing → Chemical products → Electricity, gas, and water                                                | 0.0000 | 1.9723 | 0.0000 | 24.6 |
|                             |          | Seafood processing → Food and beverage → Chemical products → Electricity, gas, and water                            | 0.0000 | 2.3370 | 0.0000 | 8.2  |
| Construction                | 0.0002   | Seafood processing → Real estate and business services → Construction                                               | 0.0000 | 1.2069 | 0.0001 | 25.4 |
|                             |          | Seafood processing → Food and beverage → Agriculture and forestry → Construction                                    | 0.0000 | 1.3738 | 0.0000 | 16.6 |
|                             |          | Seafood processing → Chemical products → Construction                                                               | 0.0000 | 1.6403 | 0.0000 | 15.8 |
|                             |          | Seafood processing → Food and beverage → Chemical products → Construction                                           | 0.0000 | 1.9435 | 0.0000 | 5.2  |
|                             |          | Seafood processing → Chemical products → Metal products → Construction                                              | 0.0000 | 1.8893 | 0.0000 | 2.0  |
| Wholesale and retail        | 0.0001   | Seafood processing → Real estate and business services → Wholesale and retail                                       | 0.0001 | 1.2395 | 0.0001 | 62.0 |
|                             |          | Seafood processing → Chemical products → Wholesale and retail                                                       | 0.0000 | 1.6826 | 0.0000 | 4.6  |
|                             |          | Seafood processing → Real estate and business services → Telecommunications and broadcasting → Wholesale and retail | 0.0000 | 1.4145 | 0.0000 | 4.2  |
|                             |          | Seafood processing → Food and beverage → Real estate and business services → Wholesale and retail                   | 0.0000 | 1.4690 | 0.0000 | 2.0  |
| Food service                | 0.2717   | Seafood processing → Food service                                                                                   | 0.2360 | 1.1006 | 0.2597 | 95.6 |
|                             |          | Seafood processing → Food and beverage → Food service                                                               | 0.0089 | 1.3044 | 0.0116 | 4.3  |
| Transportation              | 5.94E-05 | Seafood processing → Real estate and business services → Transportation                                             | 0.0000 | 1.2736 | 0.0000 | 40.2 |
|                             |          | Seafood processing → Chemical products → Transportation                                                             | 0.0000 | 1.7270 | 0.0000 | 9.6  |
|                             |          | Seafood processing → Chemical products → Coal and petroleum → Transportation                                        | 0.0000 | 1.7990 | 0.0000 | 5.0  |
|                             |          | Seafood processing → Chemical products → Transport equipment → Transportation                                       | 0.0000 | 2.3884 | 0.0000 | 4.7  |
|                             |          | Seafood processing → Food and beverage → Chemical products → Transportation                                         | 0.0000 | 2.0462 | 0.0000 | 3.2  |
|                             |          | Seafood processing → Social and other services → Transportation                                                     | 0.0000 | 1.2216 | 0.0000 | 3.1  |
|                             |          | Seafood processing → Real estate and business services → Finance and insurance → Transportation                     | 0.0000 | 1.6635 | 0.0000 | 3.0  |
|                             |          | Seafood processing → Real estate and business services → Coal and petroleum → Transportation                        | 0.0000 | 1.3318 | 0.0000 | 2.9  |

|                                     |          |                                                                                                                      |        |        |        |      |
|-------------------------------------|----------|----------------------------------------------------------------------------------------------------------------------|--------|--------|--------|------|
| Telecommunications and broadcasting | 0.0001   | Seafood processing → Real estate and business services → Telecommunications and broadcasting                         | 0.0000 | 1.3849 | 0.0000 | 63.7 |
|                                     |          | Seafood processing → Social and other services → Telecommunications and broadcasting                                 | 0.0000 | 1.3339 | 0.0000 | 6.6  |
|                                     |          | Seafood processing → Real estate and business services → Wholesale and retail → Telecommunications and broadcasting  | 0.0000 | 1.4145 | 0.0000 | 5.3  |
|                                     |          | Seafood processing → Food and beverage → Social and other services → Telecommunications and broadcasting             | 0.0000 | 1.5808 | 0.0000 | 3.7  |
|                                     |          | Seafood processing → Food and beverage → Real estate and business services → Telecommunications and broadcasting     | 0.0000 | 1.6413 | 0.0000 | 2.1  |
| Finance and insurance               | 8.47E-05 | Seafood processing → Real estate and business services → Finance and insurance                                       | 0.0000 | 1.5762 | 0.0001 | 77.9 |
|                                     |          | Seafood processing → Real estate and business services → Telecommunications and broadcasting → Finance and insurance | 0.0000 | 1.8084 | 0.0000 | 3.5  |
|                                     |          | Seafood processing → Food and beverage → Real estate and business services → Finance and insurance                   | 0.0000 | 1.8681 | 0.0000 | 2.6  |
| Real estate and business services   | 0.0014   | Seafood processing → Real estate and business services                                                               | 0.0011 | 1.2060 | 0.0013 | 93.3 |
|                                     |          | Seafood processing → Food and beverage → Real estate and business services                                           | 0.0000 | 1.4293 | 0.0000 | 3.1  |
| Public administration and defense   | 0.0001   | Seafood processing → Food and beverage → Agriculture and forestry → Public administration and defense                | 0.0000 | 1.3695 | 0.0000 | 30.8 |
|                                     |          | Seafood processing → Real estate and business services → Public administration and defense                           | 0.0000 | 1.2061 | 0.0000 | 25.2 |
|                                     |          | Seafood processing → Food and beverage → Public administration and defense                                           | 0.0000 | 1.3046 | 0.0000 | 18.4 |
|                                     |          | Seafood processing → Chemical products → Public administration and defense                                           | 0.0000 | 1.6353 | 0.0000 | 2.1  |
| Educational and health services     | 0.0003   | Seafood processing → Chemical products → Educational and health services                                             | 0.0000 | 1.6683 | 0.0001 | 25.8 |
|                                     |          | Seafood processing → Food and beverage → Agriculture and forestry → Educational and health services                  | 0.0000 | 1.3977 | 0.0001 | 21.2 |
|                                     |          | Seafood processing → Food and beverage → Educational and health services                                             | 0.0000 | 1.3316 | 0.0000 | 16.9 |
|                                     |          | Seafood processing → Real estate and business services → Educational and health services                             | 0.0000 | 1.2306 | 0.0000 | 13.6 |
|                                     |          | Seafood processing → Food and beverage → Chemical products → Educational and health services                         | 0.0000 | 1.9767 | 0.0000 | 8.6  |
| Social and other services           | 0.0004   | Seafood processing → Social and other services                                                                       | 0.0002 | 1.1559 | 0.0002 | 49.6 |
|                                     |          | Seafood processing → Food and beverage → Social and other services                                                   | 0.0001 | 1.3700 | 0.0001 | 27.5 |
|                                     |          | Seafood processing → Real estate and business services → Social and other services                                   | 0.0000 | 1.2640 | 0.0000 | 10.6 |
|                                     |          | Seafood processing → Chemical products → Social and other services                                                   | 0.0000 | 1.7170 | 0.0000 | 3.7  |
| Office supplies                     | 8.19E-06 | Seafood processing → Chemical products → Office supplies                                                             | 0.0000 | 1.6390 | 0.0000 | 24.2 |
|                                     |          | Seafood processing → Food and beverage → Wood and paper → Office supplies                                            | 0.0000 | 1.7091 | 0.0000 | 10.9 |

|  |  |                                                                                                      |        |        |        |     |
|--|--|------------------------------------------------------------------------------------------------------|--------|--------|--------|-----|
|  |  | Seafood processing → Food and beverage → Agriculture and forestry → Wood and paper → Office supplies | 0.0000 | 1.7939 | 0.0000 | 9.5 |
|  |  | Seafood processing → Food and beverage → Chemical products → Office supplies                         | 0.0000 | 1.9420 | 0.0000 | 8.0 |
|  |  | Seafood processing → Chemical products → Wood and paper → Office supplies                            | 0.0000 | 2.1401 | 0.0000 | 6.1 |
|  |  | Seafood processing → Real estate and business services → Wholesale and retail → Office supplies      | 0.0000 | 1.2417 | 0.0000 | 5.2 |
|  |  | Seafood processing → Chemical products → Other manufacturing → Office supplies                       | 0.0000 | 1.7697 | 0.0000 | 3.5 |
|  |  | Seafood processing → Chemical products → Printing and copying → Office supplies                      | 0.0000 | 1.8522 | 0.0000 | 2.7 |
|  |  | Seafood processing → Food and beverage → Chemical products → Wood and paper → Office supplies        | 0.0000 | 2.5356 | 0.0000 | 2.0 |
